# Supplementary material for: Mouse endogenous retroviruses can trigger premature transcriptional termination at a distance
Source: HighWire-hosted journal article supplement (doi:10.1101/gr.130740.111), 2012-02-23
Supplement: LiSupplemental.pdf [file LiSupplemental.pdf]

## SUPPLEMENTAL INFORMATION

### Endogenous retroviruses can trigger premature transcriptional termination at a distance – Li et al.

#### *Identification of ERVs using transposon junction assay*

Out of 565,265 barcoded 454 pyrosequencing traces generated, 200,713 traces contain at least 50 nt of transposon-derived sequence and at least 15 nt of flanking genomic sequence, and mapped to the reference genome.

#### *Validation of ERVs in B6 reference genome by targeted sequencing*

To check if there is detection bias in identifying ERVs using the transposon junction assay, at a chromosomal level, we counted ERV elements (i.e. IAPLTR1, IAPLTR2 and IAPEY2) in 10 Mbp bins for both reference (expected) and sequencing output (observed). Using Fisher's exact test ( $\alpha = 0.05$ ), we found that zero out of 255 bins showed a distribution distinct from the reference distribution of IAPLTR1 elements. Similarly, out of 255 bins, only 2 (IAPLTR2) or 5 (IAPEY2) bins showed distributions distinct from the reference. Further, the observed numbers of ERVK elements in bins are significantly correlated well to the numbers of expected ERVK elements ( $p < 2.2E-16$ ). Pearson's correlation coefficients are IAPLTR1=0.75, IAPLTR2=0.78, IAPEY2=0.60.

#### *Comparison between transposon integrants in reference genome vs. other mouse lineages.*

The proportions of various classes of polymorphic transposons that are present in the reference genome are very similar to those identified in the previously unsequenced Celera strains (**Supp. Fig. 2**). Notably, the relative proportions of polymorphic SINE retrotransposons present in the reference genome vs. in the previously unsequenced strains are the most discrepant of all transposon classes (**Supp. Fig. 2**). This discrepancy could be due to technical aspects of alignment of WGS traces to the SINEs' target sites: polymorphic SINE integrants would be "skipped over" when present in the reference sequence, while by contrast their precise genomic

junctions and mobilized internal sequences would be required within the sequence traces when they are present in the previously unsequenced strains.

Analysis of other WGS traces, predicting a polymorphic transposon integrant present in a previously unsequenced genome (that is the traces' source) but absent from the reference genome, is more complicated. The reason why full-length sequences for such integrants usually cannot be determined from WGS trace alignments is that such sequence traces on average are only 799 nucleotides (nt) long, so they can extend only partially into longer polymorphic integrants (Akagi et al. 2008). The WGS traces generally were not derived from BAC clones, which would facilitate unique identification of repetitive elements because of the limited genomic sequences that are represented. Moreover, although traces were filtered for overall sequence quality, we observed that in many cases, their quality deteriorated at one end, with patches of sequence data with Phred scores below 20 (see Methods).

To address these issues about the particular categories of WGS trace alignments, where one end aligned well to the reference genome while the other was unaligned, we used RepeatMasker (Smit et al. 2009) to identify particular classes of mouse transposon sequences within them. We tested the hypothesis that a significant fraction of such WGS traces could be comprised of polymorphic transposon integrants, so they could be used to map junctions between transposon variants and unique genomic sequences. Since we previously observed that most polymorphic integrants in the B6 reference genome are caused by endogenous retrotransposition by LINE (L1), SINE and ERV-K LTR retrotransposons, we used RepeatMasker to identify corresponding WGS traces containing these sequences. These repeat sequences within the traces were then masked temporarily, while the remaining, non-repetitive sequences of the WGS traces were re-aligned to the reference genome using BLAT. The resulting alignments were used to categorize and map polymorphic integrants in the unknown strains.

## **SUPPLEMENTAL METHODS**

### *Identification of ERVs using transposon junction assay*

To develop the transposon junction assay, we designed forward PCR primers to anneal within young, highly conserved ERV integrant sequences. To amplify young ERVs, i.e. IAPLTR1 elements, we used a relatively non-

degenerate primer no. 1, i.e. DES3356, 5'-AGATTYTTGGTCTGTGGTGTTC-3', which anneals approximately 31 nt from the 3' end of the LTR. To amplify a wider range of ERV IAP subfamilies including older IAPLTR2 and IAPEY2 elements with more divergent LTRs, we used a more degenerate primer no. 2, DES3355, 5'-CTTTGCCGCAGAAGRWTCYG-3', positioned about 47 nt from the 3' end. Reverse primers are based on adaptor sequences ligated to genomic restriction endonuclease sites such as Sau3AI, adjacent to the genomic ERV integrant. See **Supp. Table 1**.

Resulting sequence traces were aligned to the mm8 mouse reference genome and analyzed for indel polymorphism status, using modifications of our sequence alignment pipeline (Akagi et al. 2008). A key advantage of this procedure, in comparison with other mapping procedures (Ewing and Kazazian 2010; Huang et al. 2010), is that it directly gives precise genomic sequence junctions for insertions. Similar methods have been described recently (Iskow et al. 2010; Witherspoon et al. 2010).

To identify previously unsequenced ERV integrants, sequencing reads from these PCR amplicons were mapped to the reference mouse genome assembly in three steps: preprocessing of reads, mapping of reads, and clustering of overlapping reads defining discrete insertion sites. Prior to 454 sequencing, we multiplexed samples using unique identifying barcodes of ten nucleotides. Resulting sequence reads containing a perfectly matching barcode or a barcode with a single nucleotide mismatch were categorized according to sample inputs. After trimming barcodes from 454 reads, we confirmed the presence of distal ERV sequences, to identify *bona fide* genomic integrant junctions. Long terminal repeat sequences of mouse IAP retrotransposons from RepBase (Jurka et al. 2005) were used as query sequences for Cross\_match to search the reads (parameter: minscore=35). Reads with long terminal repeat sequences immediately adjacent to the barcode (i.e within 5 nucleotides, nt in the sense direction) indicated positive PCR amplicons. A majority of reads contained valid IAP long terminal repeats (>70% for degenerate primer and >90 % for non-degenerate primer; data not shown).

Traces containing 10 nt or longer flanking genomic sequences were selected for further genome mapping. To identify ERV insertion sites, we aligned untrimmed/trimmed reads against mouse genome assembly (UCSC mm8 assembly). To re-map reference ERVs, i.e. those elements already annotated in the B6 genome, we aligned IAP untrimmed traces (containing both ERV LTR and flanking genomic sequence) to the reference assembly

using BLAT. If untrimmed reads aligned with identity >90%, coverage >90%, and score difference to next best hit >10 points, we called such reads as mapped to unique ERVs present in the reference genome. To identify previously unsequenced IAP retrotransposons not annotated in the reference assembly, we trimmed the ERV LTR sequences from unmapped reads and mapped the remaining sequence traces to the reference genome using BLAT. We used similar criteria for unique alignment cutoff (identity >90%, coverage >60%, score difference to next best hit >10 points).

Unique loci then were identified by clustering reads that each aligned within 20 nt to the same chromosomal loci in the same orientation. The absence of ERV insertions in the reference genome immediately adjacent to called integrants was confirmed by comparison of RepeatMasker output for the reference genome assembly.

The transposon junction assay was used to identify previously unsequenced ERV elements in six diverse mouse lineages, i.e. A/J, B6, CAST, MOLF, SPRET and WSB. Out of 565,265 barcoded 454 pyrosequencing traces generated, 200,713 traces contain at least 50 nt of transposon-derived sequence and at least 15 nt of flanking genomic sequence, and mapped to the reference genome.

#### *Identification of mouse ERVs from conventional Celera sequences*

We downloaded 26 million Celera whole genome shotgun sequence reads (Mural et al. 2002) from the NCBI TraceDB archive (<http://www.ncbi.nlm.nih.gov/Traces>). These conventional Sanger sequence reads average approximately 800 nt in length. They were obtained from “Celera” mouse strains, i.e. B6, A/J, DBA/2J, 129S1/SvImJ and 129X1/SvJ (Akagi et al. 2008). To identify both non-polymorphic ERV insertions and previously unknown, polymorphic ERV insertions, these reads were mapped to the B6 mouse reference genome assembly (UCSC mm8 build, (Kuhn et al. 2009)) using GMAP (Wu and Watanabe 2005). Resulting read alignments were categorized into different groups, distinguishing between insertions in the B6 reference genome vs. in the other strains. Reads from the first category aligned to the reference with two anchoring high scoring pairs (each length >200 nt, identity >90%) flanking one gap (between 100 nt and 10 kb), as we previously described (Akagi et al. 2008). Reads in the second category had one well-aligned end (size >200 nt, identity

>90%) and the other end not aligned (non-aligned fragment size >100 nt). To identify insertions in alternative strains, we analyzed these 2.1 million partially aligned traces further. Low phred quality scores were associated with the non-aligned region of 1.9 million of these reads. The rest of the traces included 50% or more repetitive elements in the non-aligned region or occasionally in the aligned region. To identify the recent movement of retrotransposons, we trimmed retrotransposon sequences (SINEs, LINEs, and LTRs including ERVs) from these traces using RepeatMasker (Smit et al. 2009) and remapped these trimmed traces to the mouse reference assembly using BLAT (Kent 2002). If the trimmed traces were mapped with identity>90% and coverage>90%, those that mapped within +/- 20 nt of each other in the same orientation were merged into unique insertion clusters. We identified >30,000 retrotransposon-related indel polymorphisms: 12,305 insertions in the B6 reference genome that are not present in at least one of the other Celera strains, and 18,594 insertions in at least one of the four other Celera strains that are not present in the reference B6 genome (**Supp. Fig. 2**).

#### *Northern blots and RT-PCR assays*

For Northern blot hybridization, total RNAs isolated from various mouse tissues were electrophoresed in agarose gels under standard conditions, transferred to charged nylon membranes (GE Amersham) and hybridized with radiolabeled DNA probes, essentially as described previously (Li et al. 1999). Membranes were washed and exposed to film for autoradiography. Probes at the 5' and 3' ends, respectively, of *Slc15a2* transcripts were generated by amplifying mouse brain cDNA using forward primer (exon 1) DES2848 (5' AAATGAGTCCAAGGAAACGCTC 3') and reverse primer (exon 6) DES2849 (5' GGTAGAAGACCGAGAAGTATC 3'), and forward primer (exon 13) DES2850 (5' TTTCTGGTCC TTGTCTTCATCCC 3') and reverse primer (exon 18) DES2851 (5' CTGAGAGGAGCATTGGCATC 3'). After agarose gel electrophoresis, PCR-generated probes were purified using a gel purification kit (Qiagen). Probes were labeled with alpha-P<sup>32</sup> dCTP using the Megaprimer DNA labeling system (Amersham) and were purified using ProbeQuant G-50 Micro columns (Amersham).

To synthesize first strand cDNAs for reverse transcriptase-mediated polymerase chain reaction (RT-PCR) assays, 10 microgram each of mouse total RNAs was primed for reverse transcription, using T7 anchored

oligo(dT)<sub>24</sub> DES2633 (5'

GGCCAGTGAATTGTAATACGACTCACTATAGGGAGGCGGTTTTTTTTTTTTTTTTTTTTTTTTTTT 3') and SuperScript II Reverse Transcriptase (Invitrogen). Gene-specific primers for *Slc15a2*, *Rpo1-4* and *Spon-1* were used to amplify resulting first-strand cDNAs. Products were assessed by agarose gel electrophoresis. Quantitative RT-PCR was performed using these cDNAs and Power SYBR Green PCR master mix (ABI) on a StepOnePlus instrument (ABI). To quantify relative expression of *Polr1a* prematurely truncated transcripts (**Fig. 8**), we measured upstream and downstream transcript levels, calculated the difference in PCR cycle numbers  $\Delta\Delta C_T = (\text{ex14S-ex15A}) - (\text{ex27S-ex28A})$ , and then transformed to linear differences by calculating  $2^{-\Delta\Delta C_T}$ . *Spon1* premature truncation was measured similarly.

#### *Bioinformatics tools*

Graphical representations of exon microarray analysis results were generated using Partek Genomics Suite (<http://www.partek.com>). Venn diagrams were drawn using VennMaster (Kestler et al. 2008).

#### *Western blots*

To quantify PEPT2 expression levels and isoforms in untreated mouse samples, mice were euthanized by CO<sub>2</sub> asphyxiation, tissues immediately were dissected (Pathology and Histology Laboratory, National Cancer Institute – Frederick, MD), and immediately minced and flash frozen in liquid nitrogen. Frozen tissues were homogenized in 2 ml of NP-40 lysis buffer (containing 50 mM Tris HCl pH 8.0, 150 mM NaCl, and 1% NP-40 with protease inhibitor cocktail; Roche Diagnostics Corp, Indianapolis, IN) using several strokes of a hand-held homogenizer (size 20; Kontes Glass Co, Vineland, New Jersey). Samples were then ultrasonicated with 5 strokes at 50% power strength (Model W-225R; Heat System-Ultrasonics Inc, Plainview, NY) and centrifuged at 12,000 g for 10 min at 4°C. Protein concentrations were measured using the Pierce BCA Protein Assay kit (Thermo Scientific, Rockford, IL) and stored at -80°C. Whole tissue protein extracts were denatured at 37°C for 30 min in 1x sample buffer containing 6.25 mM Tris HCl, pH 6.8, 2% SDS, 10% glycerol, 0.1% bromophenol blue, and 0.1

M DTT. Samples were separated by 7.5% SDS-PAGE gel electrophoresis and transferred to a PVDF membrane (Millipore, Bedford, MA). For Western blotting against PEPT2, membranes were blocked with 5% skim milk in TBST buffer (150 mM NaCl, 10 mM Tris HCl pH 7.4, and 0.1% Tween 20), incubated with primary rabbit anti-mouse PEPT2 antisera raised against the COOH-terminal region, KQIPHIQGNMINLETKNTRL, amino acids 721-740 (1:5,000 dilution) (Hu et al. 2008). The filters were washed three times with TBST and then incubated with goat anti-rabbit IgG conjugated to horseradish peroxidase (1:3,000 dilution) (Bio-Rad, Hercules, CA). For  $\beta$ -actin, the membrane was blotted with a mouse monoclonal antibody (1:1,000 dilution) (Santa Cruz Biotechnology, Santa Cruz, CA) followed by the secondary goat anti-mouse IgG conjugated to horseradish peroxidase at 1:3,000 dilution (Santa Cruz Biotechnology, Santa Cruz, CA). The membranes were then washed five times in TBST, and bound antibody was detected with Immobilon Western chemiluminescent substrate (Millipore, Billerica, MA).

#### *PEPT2 functional assay*

To assay PEPT2 protein functional activity in different mouse strains and tissues, six B6 mice (3 females, 3 males) and five DBA/2J mice (3 females, 2 males) were anesthetized with pentobarbital sodium (40 mg/kg ip) and then administered, via tail vein injection, 100  $\mu$ L GlySar solution containing 5  $\mu$ Ci of  $^{14}$ C-GlySar (98 mCi/mmol, 0.1 mCi/ml; Moravek, Brea, CA). The final dosage of GlySar was based on 20 g mice at 2.5 nmol/g body weight. To correct for tissue vascular space, 100  $\mu$ L of 0.2  $\mu$ Ci  $^3$ H-dextran-70,000 (265 mCi/g; American Radiolabeled Chemicals, Saint Louis, MO) was injected intravenously two min prior to euthanasia and tissue collections. Whole blood, combined choroid plexuses (from lateral and fourth ventricles), and lung were obtained 60 min after GlySar administration. A 0.3-ml aliquot of hyamine hydroxide was added to each sample and treated under standard protocol; 7 ml of CytoScint scintillation liquid was then added. Samples were stabilized for one week and counted on a scintillation counter. Corrected tissue concentrations of GlySar (nmol/g of wet tissue) were calculated as  $C_{tiss} - DS \times C_b$ , where  $C_{tiss}$  is the uncorrected tissue concentration of GlySar (nmol/g), DS is the dextran space (mL/g), and  $C_b$  is the GlySar blood concentration. (Ocheltree et al. 2005; Shen et al. 2007)

Since differences in tissue concentration could be due to concentration differences of GlySar in the perfusing blood, the data are reported as tissue-to-blood concentration ratio (i.e., normalized ratio).

## SUPPLEMENTAL REFERENCES

- Akagi K, Li J, Stephens RM, Volfovsky N, Symer DE. 2008. Extensive variation between inbred mouse strains due to endogenous L1 retrotransposition. *Genome Res* **18**(6): 869-880.
- Druker R, Bruxner TJ, Lehrbach NJ, Whitelaw E. 2004. Complex patterns of transcription at the insertion site of a retrotransposon in the mouse. *Nucleic Acids Res* **32**(19): 5800-5808.
- Ewing AD, Kazazian HH, Jr. 2010. High-throughput sequencing reveals extensive variation in human-specific L1 content in individual human genomes. *Genome Res* **20**(9): 1262-1270.
- Frazer KA, Eskin E, Kang HM, Bogue MA, Hinds DA, Beilharz EJ, Gupta RV, Montgomery J, Morenzoni MM, Nilsen GB et al. 2007. A sequence-based variation map of 8.27 million SNPs in inbred mouse strains. *Nature* **448**(7157): 1050-1053.
- Hu Y, Smith DE, Ma K, Jappara D, Thomas W, Hillgren KM. 2008. Targeted disruption of peptide transporter *Pept1* gene in mice significantly reduces dipeptide absorption in intestine. *Mol Pharm* **5**(6): 1122-1130.
- Huang CR, Schneider AM, Lu Y, Niranjana T, Shen P, Robinson MA, Steranka JP, Valle D, Civin CI, Wang T et al. 2010. Mobile interspersed repeats are major structural variants in the human genome. *Cell* **141**(7): 1171-1182.
- Iskow RC, McCabe MT, Mills RE, Torene S, Pittard WS, Neuwald AF, Van Meir EG, Vertino PM, Devine SE. 2010. Natural mutagenesis of human genomes by endogenous retrotransposons. *Cell* **141**(7): 1253-1261.
- Jurka J, Kapitonov VV, Pavlicek A, Klonowski P, Kohany O, Walichiewicz J. 2005. Repbase Update, a database of eukaryotic repetitive elements. *Cytogenet Genome Res* **110**(1-4): 462-467.
- Keane TM, Goodstadt L, Danecek P, White MA, Wong K, Yalcin B, Heger A, Agam A, Slater G, Goodson M et al. 2011. Mouse genomic variation and its effect on phenotypes and gene regulation. *Nature* **477**(7364): 289-294.
- Kent WJ. 2002. BLAT--the BLAST-like alignment tool. *Genome Res* **12**(4): 656-664.
- Kestler HA, Muller A, Kraus JM, Buchholz M, Gress TM, Liu H, Kane DW, Zeeberg BR, Weinstein JN. 2008. VennMaster: area-proportional Euler diagrams for functional GO analysis of microarrays. *BMC Bioinformatics* **9**: 67.
- Kuhn RM, Karolchik D, Zweig AS, Wang T, Smith KE, Rosenbloom KR, Rhead B, Raney BJ, Pohl A, Pheasant M et al. 2009. The UCSC Genome Browser Database: update 2009. *Nucleic Acids Res* **37**(Database issue): D755-761.
- Li J, Protopopov AI, Gizatullin RZ, Kiss C, Kashuba VI, Winberg G, Klein G, Zabarovsky ER. 1999. Identification of new tumor suppressor genes based on in vivo functional inactivation of a candidate gene. *FEBS Lett* **451**(3): 289-294.
- Mural RJ, Adams MD, Myers EW, Smith HO, Miklos GL, Wides R, Halpern A, Li PW, Sutton GG, Nadeau J et al. 2002. A comparison of whole-genome shotgun-derived mouse chromosome 16 and the human genome. *Science* **296**(5573): 1661-1671.
- Ocheltree SM, Shen H, Hu Y, Keep RF, Smith DE. 2005. Role and relevance of peptide transporter 2 (PEPT2) in the kidney and choroid plexus: in vivo studies with glycylsarcosine in wild-type and PEPT2 knockout mice. *J Pharmacol Exp Ther* **315**(1): 240-247.
- Shen H, Ocheltree SM, Hu Y, Keep RF, Smith DE. 2007. Impact of genetic knockout of PEPT2 on cefadroxil pharmacokinetics, renal tubular reabsorption, and brain penetration in mice. *Drug Metab Dispos* **35**(7): 1209-1216.
- Smit AFA, Hubley R, Green P. 2009. RepeatMasker.
- Witherspoon DJ, Xing J, Zhang Y, Watkins WS, Batzer MA, Jorde LB. 2010. Mobile element scanning (ME-Scan) by targeted high-throughput sequencing. *BMC Genomics* **11**: 410.



Wu TD, Watanabe CK. 2005. GMAP: a genomic mapping and alignment program for mRNA and EST sequences. *Bioinformatics* **21**(9): 1859-1875.

## SUPPLEMENTAL FIGURE LEGENDS.

**Supp. Fig. 1. Transposon junction assay efficiently identifies most young ERV integrants.** (A) Schematic of assay. *Top*: full-length mouse ERV insertion containing LTRs (*blue horizontal arrows*) and flanked by target site duplications (TSD, *red circles*). Genomic DNA samples were digested with restriction endonucleases (*red, blue, green arrows*) such as DpnII, MseI or BfaI, and then MfeI (*yellow arrow*) to destroy internal ERV sequences that otherwise would be trivially sequenced. Adaptors including 454 primer and barcode sequences were ligated to resulting overhangs. Transposon junctions were amplified by PCR, using a degenerate primer specific for transposon sequences paired with an adaptor primer, and 454 sequencing was performed. *Bottom*: resulting sequence traces were aligned to the mm8 mouse reference assembly, confirming known ERV integrants (*left*) and identifying previously unsequenced indel polymorphisms (*right*) (Akagi et al. 2008). (B) Remapping reference ERV integrants. *Horizontal bars*: schematic of mouse genome represented in chromosomes 1-19, X and Y. We divided the mouse genome into 10 MB bins (total, 255 bins) and compared counts of young ERVK elements (categorized as IAPLTR1, IAPLTR2, and IAPEY2) in each bin for observed sequencing output (*histograms above, blue*) vs. expected reference elements (*histograms below, red*). Using Fisher's exact test ( $\alpha=0.05$ ), for IAPLTR1 elements, 0 out of 255 bins showed observed counts significantly different from the reference distribution. For IAPLTR2 elements, only 2 out of 255 bins, and for IAPEY2, 5 out of 255 bins showed observed counts significantly different from the reference counts. (C) A collection of ERV integrants identified by the transposon junction assay using 454 sequencing (*top*) was validated by PCR (*bottom*). (See **Supp. Table 2.**) *Top*: In each row, the name, chromosomal coordinates, number of 454 reads identified from the transposon junction assay per strain, presence (1) or absence (0) status in the reference genome assembly, and ERV subfamily classification are presented for ERV integrants tested by PCR. Genomic DNAs purified from B6, CAST and SPRET mice were amplified by PCR using site-specific primers. *Bottom*: Products from each tested ERV

integrant locus were electrophoresced in agarose gels. Occupied vs. empty target sites were identified by bands of appropriate sizes.

Supp. Fig. 2. Distributions of retrotransposon integrants in various mouse lineage genomes. (A, B) The proportions of various transposon family polymorphisms in distinct Celera mouse strains are represented in pie charts. The proportions are very similar regardless of which strain genome is considered as the reference genome. By aligning 26 million reads from Celera shotgun sequencing (Akagi et al. 2008), we identified (A) 12,305 polymorphic transposon insertions that are present in the C57BL6/J reference strain and absent from at least one of the other Celera strains (129S1/SVIMJ, 129X1/SVJ, A/J, and DBA/2J), and (B) 18,594 transposon insertions present in at least one of the four Celera strains and absent from the B6 reference. *Legend:* various transposon families as defined by RepBase. (C) Chromosomal distributions of reference and polymorphic LTR (ERV; *left, green histograms*) vs. L1 (*right, blue histograms*) integrants, displayed as the number of integrants per 500 kb for all autosomes and the X chromosome (*scale bars, bottom*). B6 reference genome (*dark histograms, x-axis*) and cumulative polymorphic insertions in other Celera strains (*light histograms, x-axis*) are plotted as histograms. *Center, G + C grayscale:* percentage of G+C nucleotide content in 500 kb chromosomal windows.

Supp. Fig. 3. Significant changes in truncated and non-terminated *Slc15a2* transcripts in strains harboring ERV<sub>*Slc15a2*</sub>. (A) Loading controls for total RNAs in Northern blot (**Fig. 3**). *Top:* 28S; *bottom:* 18S rRNA bands for each sample as indicated. (B) Quantitative RT-PCR was performed using primers to detect non-terminated (*light gray*) and upstream (*dark gray*) *Slc15a2* transcripts in pooled total RNAs from brains of different mouse strains. Results were normalized using a standard curve, generated using dilutions of known concentrations of *Slc15a2* cDNA template, and are displayed as total pg *Slc15a2* transcripts ( $\times 10^{-4}$ ). Differences between upstream and non-terminated transcript levels were calculated to quantify prematurely truncated transcripts (*black*). When the difference was less than 0, we arbitrarily set it as 0 (i.e. A/J mice). *Error bars:* range of duplicates. Total RNAs from adults (day 72) from indicated mouse strains A/J (*red*) or B6 (*blue*) were assayed using Affymetrix mouse exon microarrays. Log-scale signal intensities (*y-axis*) are displayed for each exon in *Slc15a2* (schematic, top,

with probes in each exon, *x-axis*). (C) Total RNAs from adults (day 72) from indicated mouse strains A/J (*red*) or B6 (*blue*) were assayed using Affymetrix mouse exon microarrays. Log-scale signal intensities (*y-axis*) are displayed for each exon in *Slc15a2* (schematic, top, with probes in each exon, *x-axis*). (D) To assess for allele-specific expression differences in truncated or non-terminated transcripts, total RNAs from heterozygous CASTxC57 and C57xC57 F1 hybrid mice, and homozygous CAST mice were compared. Gene-specific, spliced transcripts were amplified by RT-PCR at *Slc15a2*, and either sequenced in bulk (*bottom left*) or cloned into Topo plasmid vector followed by sequencing of individual colonies (*bottom right*). The results indicate that both alleles are expressed in heterozygous mice, both in truncated and non-terminated transcripts. *Top*: schematics of genes indicating exon and primer locations, PCR amplicons *T* (truncated) and *N* (non-terminated), and presence or absence of ERV integrants. *Bottom*: sequence chromatograms. *Asterisks*: chromosomal and sequence location of SNP distinguishing between strains in *Slc15a2*, chr. 16: 36772531 (mm9). *Arrows*: orientation of reading frame relative to strand that was sequenced.

**Supp. Fig. 4. Verification of ERV<sub>*Slc15a2*</sub> status in BxD RI mice.** PCR assays for (*top*) left junction; (*middle*) right junction and (*bottom*) empty target sites at ERV<sub>*Slc15a2*</sub> integration site were performed using sequence specific PCR primers and genomic DNA samples from indicated mouse lineages. *Blue headers*: discrepant mouse lineages, whose DBA-like genotypes (ERV<sub>*Slc15a2*</sub><sup>-/-</sup>) are consistent with DBA-like transcript expression levels and refute the B6-like genotypes determined using surrogate SNP at rs4173858 (**Fig. 5**).

**Supp. Fig. 5. Transcriptional disruption is strongly associated with ERV genotype at *Slc15a2*, independent of genetic background.** Individual F1 and F2 offspring of various crosses between B6 and CAST-derived mice were genotyped for the presence or absence of ERV<sub>*Slc15a2*</sub> (**Supp. Table 3**). Total RNAs were extracted from day 72 brains, and qRT-PCR assays were performed to quantify both prematurely truncated and non-terminated *Slc15a2* transcripts. To standardize input RNA levels, results were normalized to *Hprt* transcript levels. Individual results are shown in **Fig. 6D**. Results are presented as box plots for (A) ratio of truncated to non-terminated transcripts; (B) truncated; (C) non-terminated transcripts: *thick black line*, median; *red box*: 25<sup>th</sup> and 75<sup>th</sup>

percentiles; *whiskers*: standard adjacent values; and *small black dots*: outside values. Statistical significance for pairwise comparisons was adjusted using Bonferroni correction. *Brackets*: p-values for certain comparisons: **(A)** all pairwise comparisons are highly significantly different except for that between ERV<sup>+/-</sup> and ERV<sup>-/-</sup> ( $p = 0.057$ ); **(B)** all comparisons are highly significantly different except for that between ERV<sup>+/-</sup> and ERV<sup>-/+</sup> ( $p = 1$ ), ERV<sup>+/+</sup> and ERV<sup>-/+</sup> ( $p = 0.12$ ), and between ERV<sup>+/+</sup> and ERV<sup>+/-</sup> ( $p = 0.25$ ); **(C)** all comparisons are highly significantly different except for that between ERV<sup>-/+</sup> and ERV<sup>-/-</sup> ( $p = 1$ ).

Supp. Fig. 6. Disrupted expression of *Polr1a* and *Spon1*. **(A)** Total RNAs from adult brains from indicated mouse strains A/J (*red*) or DBA/2J (*blue*) were assayed using Affymetrix mouse exon microarrays. Log-scale signal intensities (*y-axis*) are displayed for each exon in *Polr1a* (schematic, top, with probes in each exon, *x-axis*). **(B-C)** To assess for allele-specific or biallelic expression in various total RNAs were assessed in heterozygous CASTxC57 and C57xC57 F1 hybrid mice, and as a control in homozygous CAST mice. Gene-specific, spliced transcripts were amplified by RT-PCR at **(B)** *Polr1a* and **(C)** *Spon1* and sequenced in bulk, so both alleles can be visualized simultaneously. *Top*: schematics of genes indicating exon and primer locations, PCR amplicons *T* (terminated) and *N* (non-terminated), and presence or absence of ERV integrants. *Bottom*: sequence chromatograms. *Asterisks*: chromosomal locations of SNPs distinguishing between strains are: **(B)** *Polr1a* termination, chr. 6: 71904935 and non-terminated, chr. 6: 71913740; and **(C)** *Spon1*, chr. 7: 121022730. The results indicate that both alleles are expressed at approximately equivalent levels in heterozygous mice, both in prematurely terminated and in non-terminated transcripts.

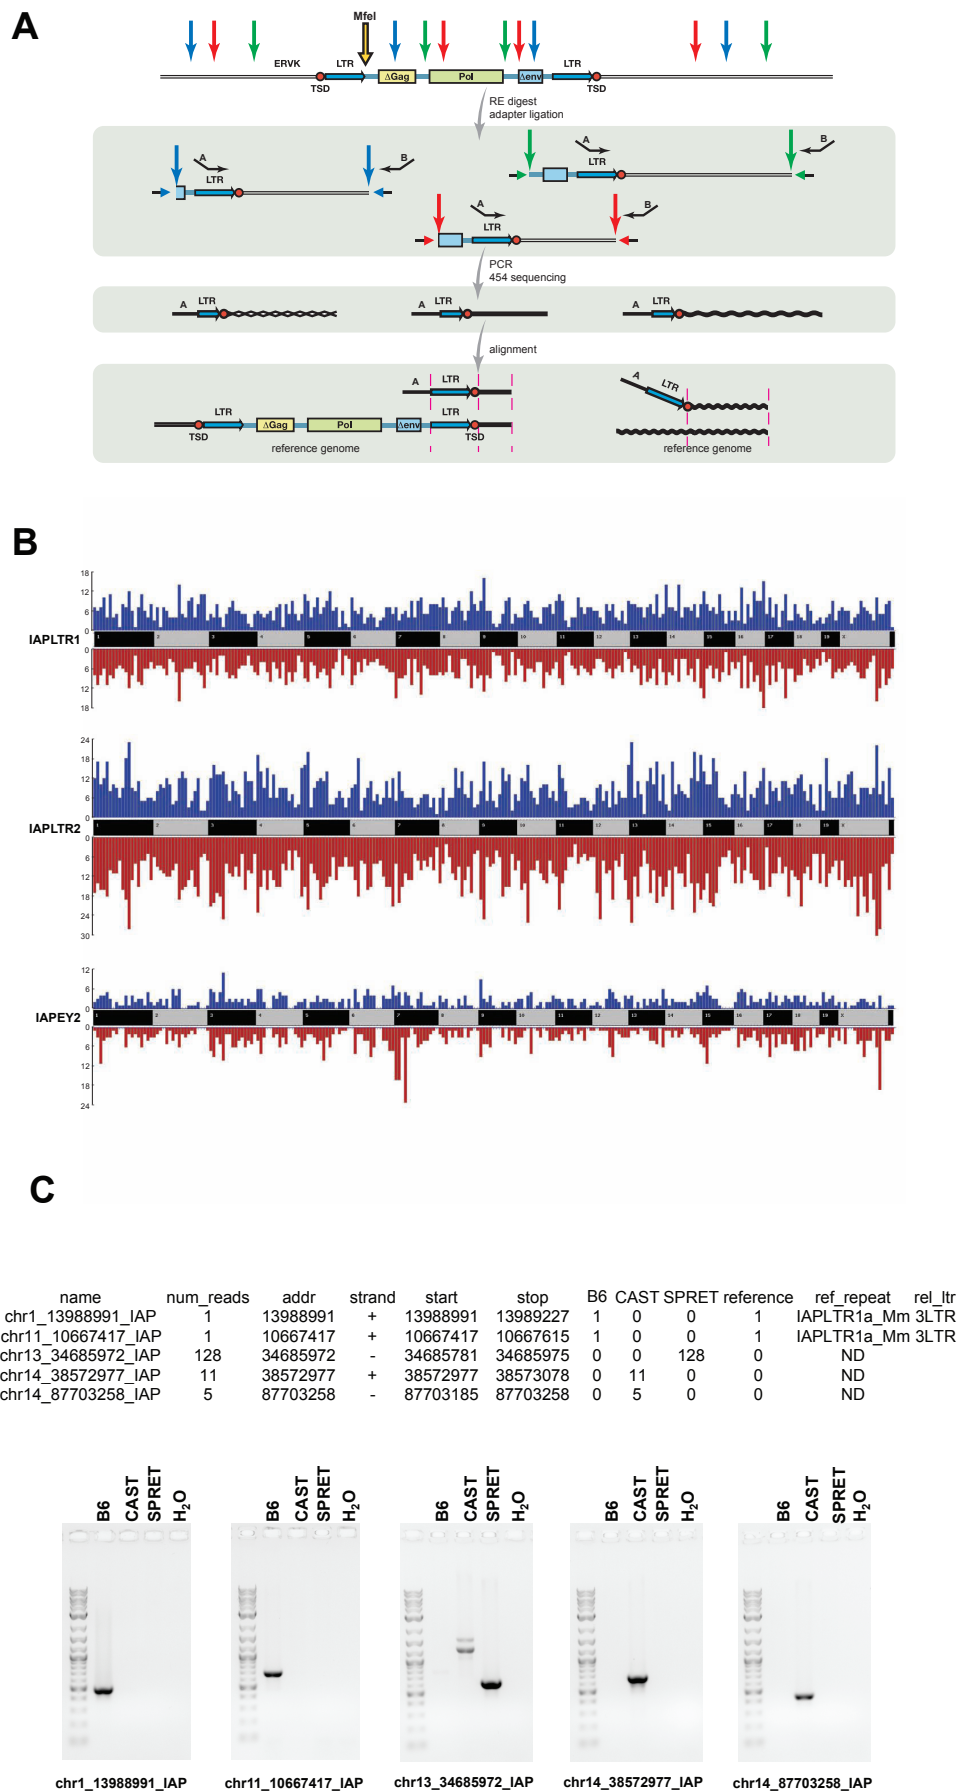

Supp. Fig. 1, Li et al.

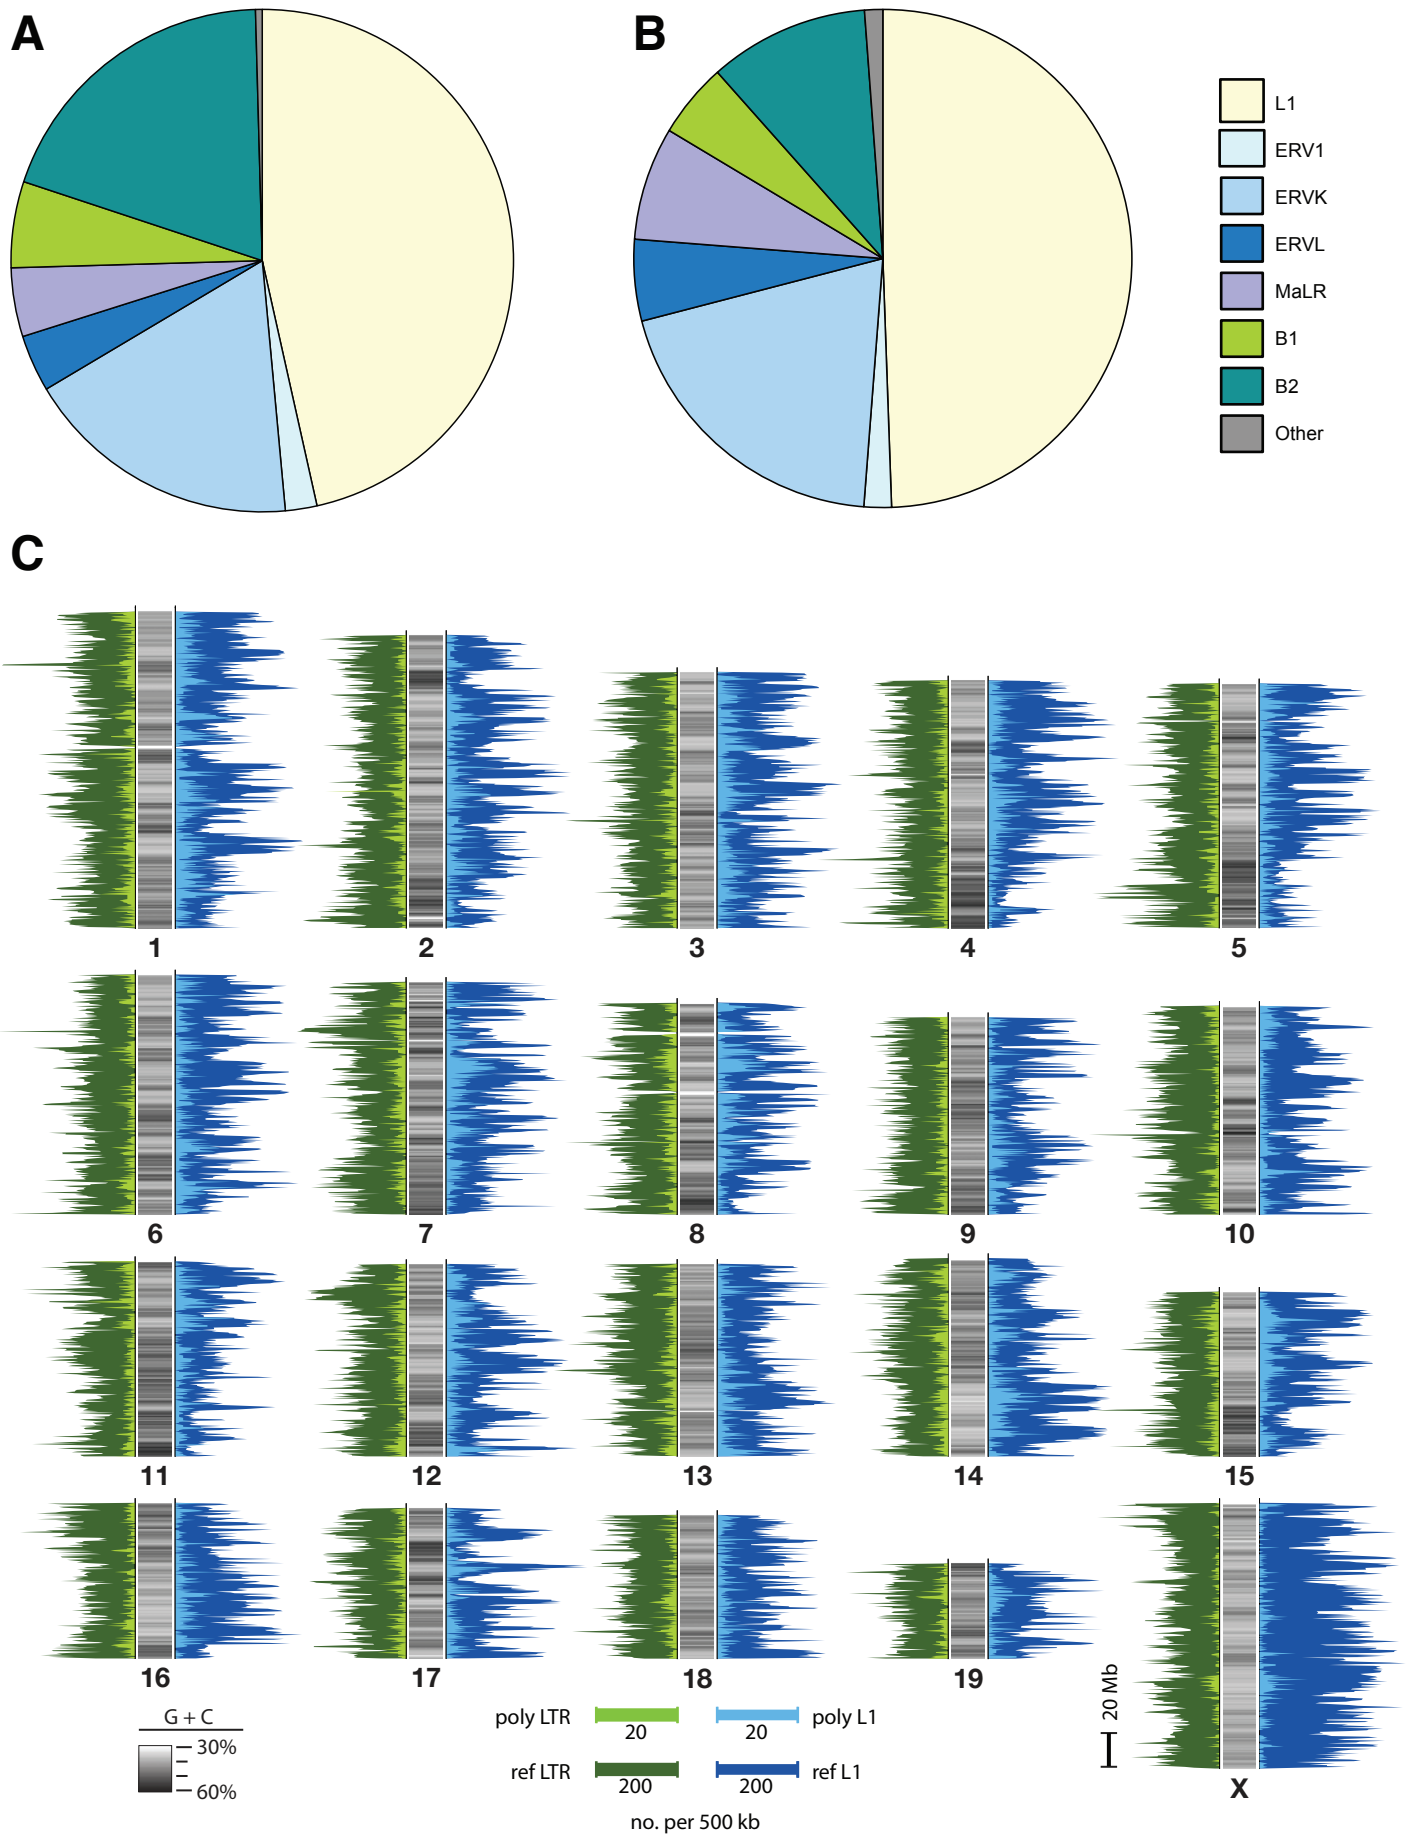

Supp. Fig. 2

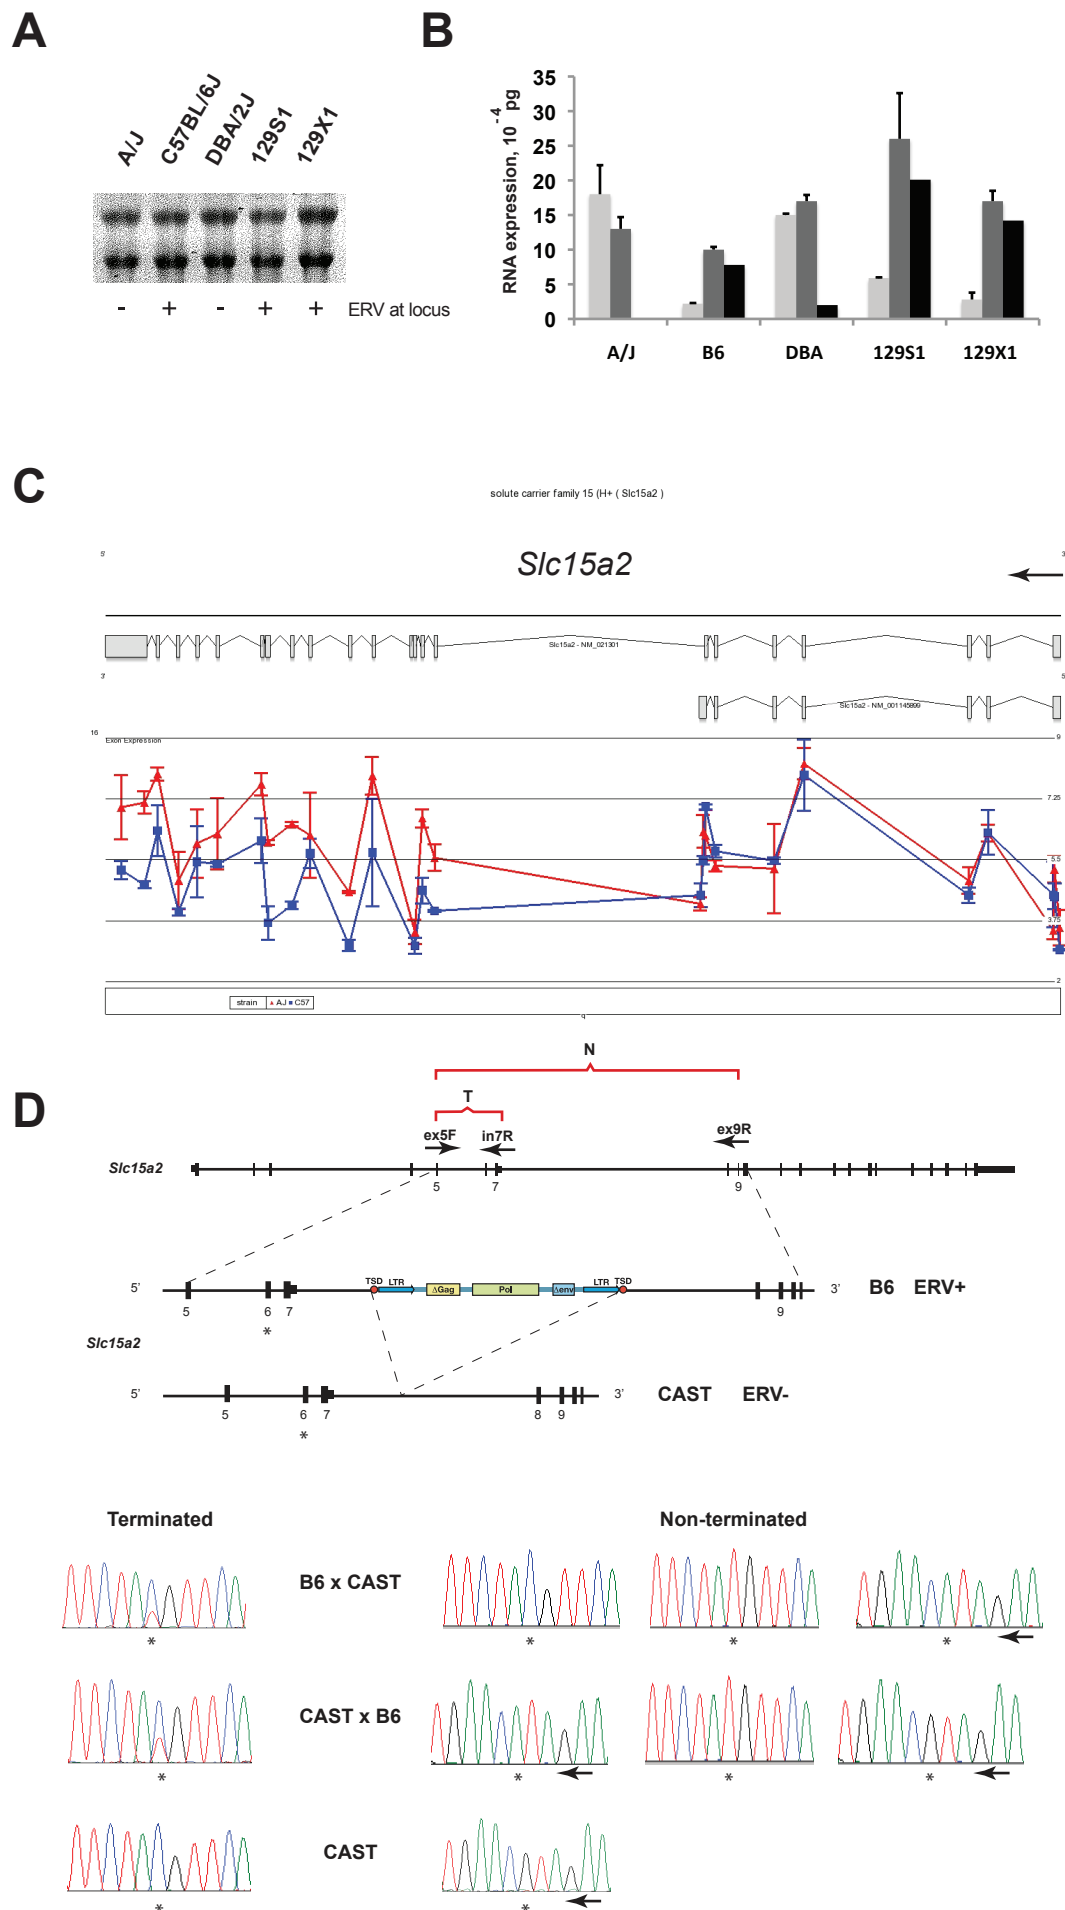

Supp. Fig. 3

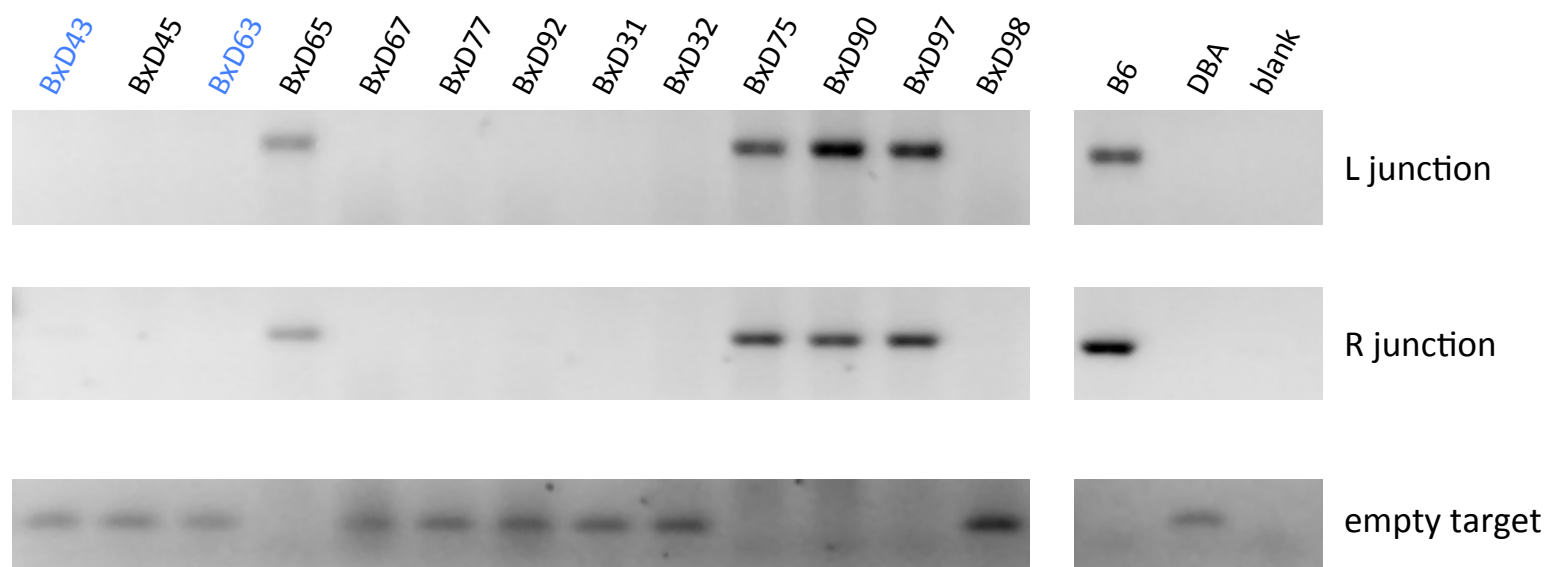

Supp. Fig. 4



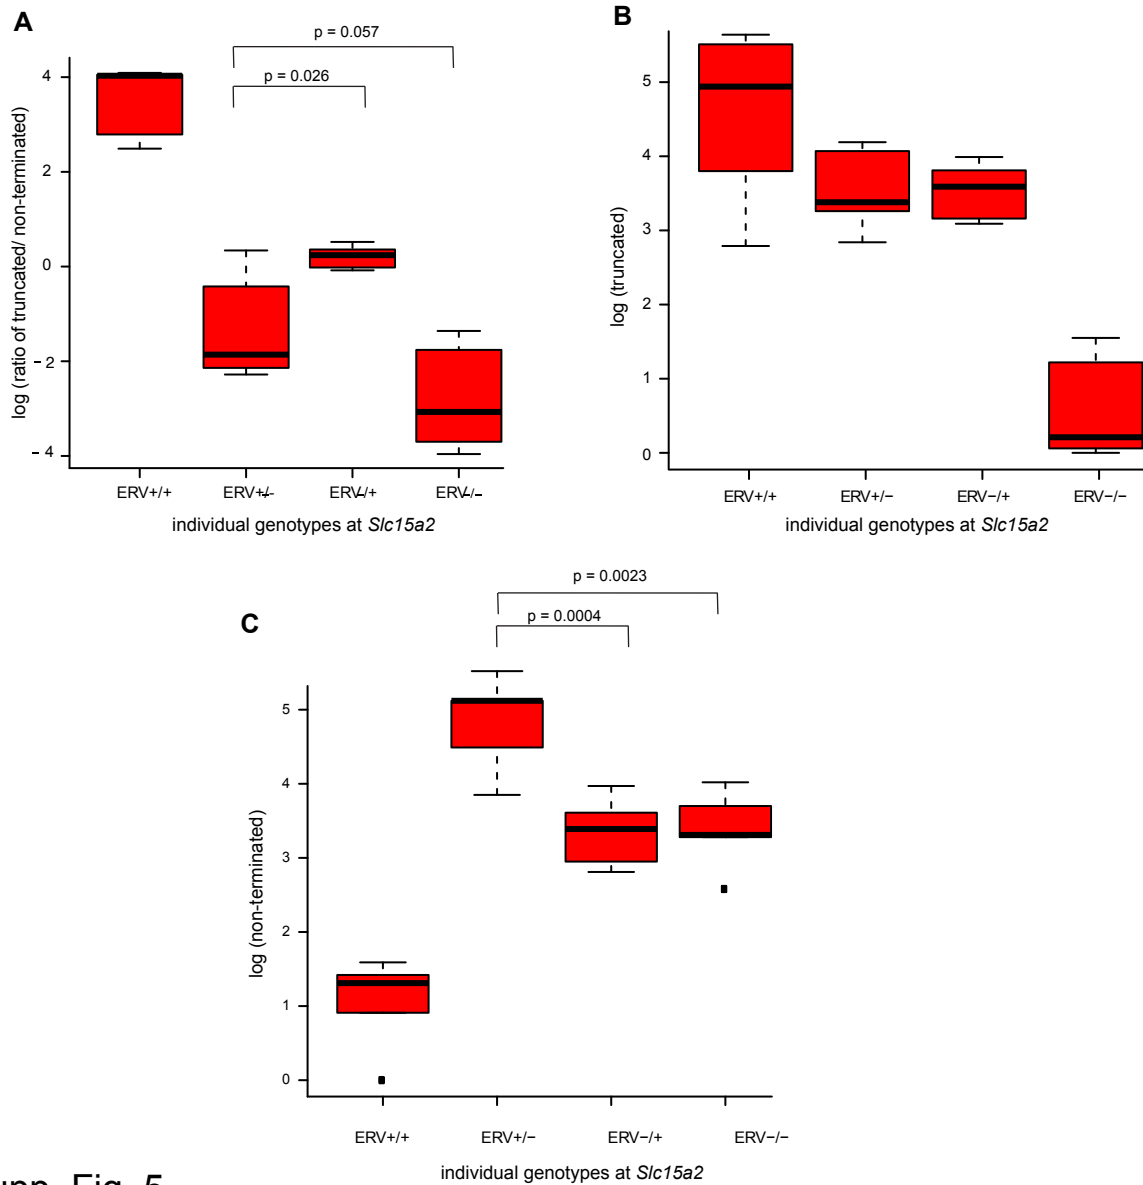

Supp. Fig. 5

**A**

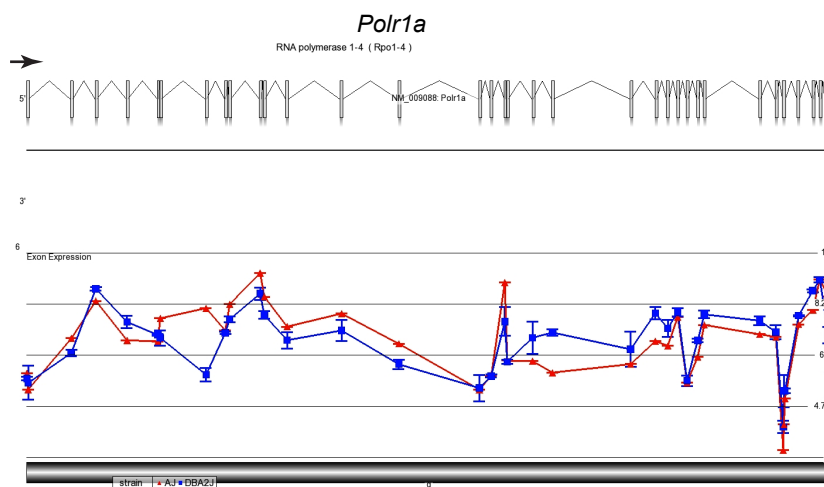

**B**

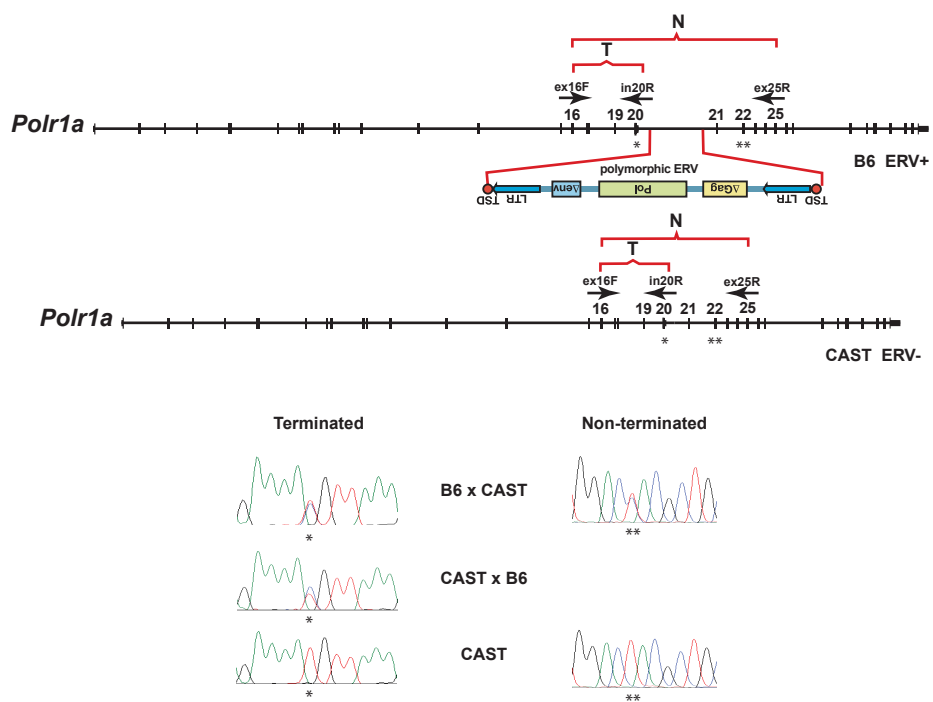

**C**

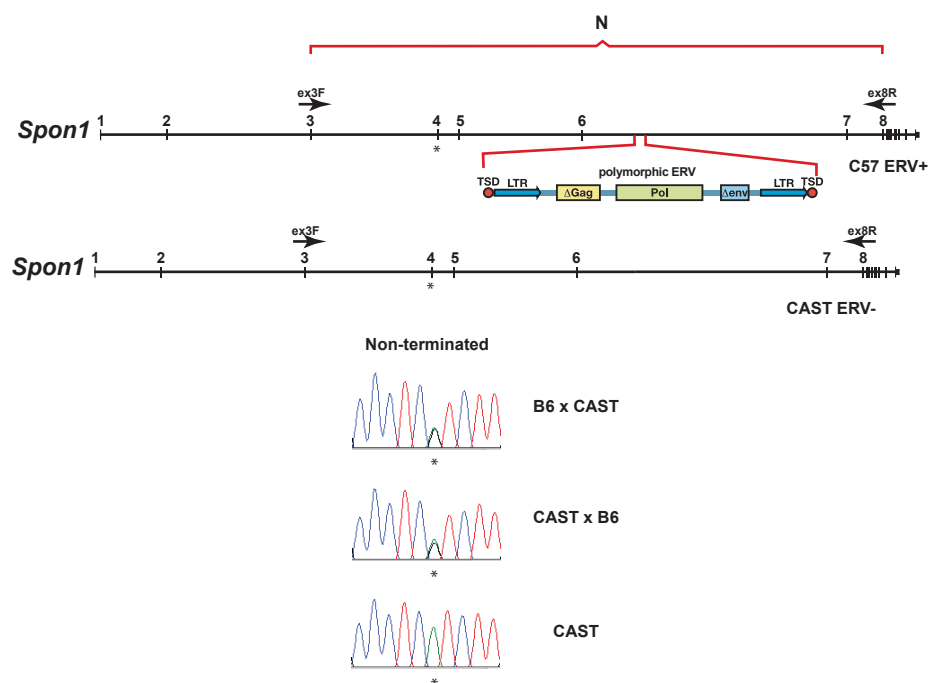

## SUPPLEMENTAL TABLES

**Supp. Table 1(A)**

| run | restriction enzyme(s) | internal ERV primer | 454 reads count | reads with IAP count | percent | mapped reads count | percent | loci count |
|-----|-----------------------|---------------------|-----------------|----------------------|---------|--------------------|---------|------------|
| 1   | DpnII                 | 1                   | 35,649          | 31,754               | 89.1%   | 28,144             | 88.6%   | 660        |
| 2   | BfaI                  | 1                   | 22,176          | 14,187               | 64.0%   | 11,241             | 79.2%   | 672        |
| 3   | BfaI/DpnII/MseI       | 2                   | 33,050          | 25,014               | 75.7%   | 21,342             | 85.3%   | 4,131      |
| 4   | BfaI/DpnII/MseI       | 2                   | 57,961          | 41,206               | 71.1%   | 34,294             | 83.2%   | 4,600      |
|     | total                 |                     | 148,836         | 112,161              | 75.4%   | 95,021             | 84.7%   | 5,334      |

**1(B)**

| ERV subfamily | no. mapped reads | no. ERVs in reference “able to be sequenced” | no. reference ERVs detected | % detected | fold coverage (mapped reads/ detected element) |
|---------------|------------------|----------------------------------------------|-----------------------------|------------|------------------------------------------------|
| IAPEY_LTR     | 1,382            | 438                                          | 104                         | 23.7%      | 13.29                                          |
| IAPEY2_LTR    | 8,524            | 852                                          | 623                         | 73.1%      | 13.68                                          |
| IAPEY3_LTR    | 162              | 443                                          | 50                          | 11.3%      | 3.24                                           |
| IAPLTR1       | 24,847           | 1,665                                        | 1,538                       | 92.4%      | 16.16                                          |
| IAPLTR2       | 31,298           | 2,967                                        | 2,321                       | 78.2%      | 13.48                                          |
| IAPLTR3       | 0                | 99                                           | 0                           | 0.0%       | 0.00                                           |
| IAPLTR4       | 6                | 323                                          | 6                           | 1.9%       | 1.00                                           |
| total         | 66,219           | 6,787                                        | 4,642                       | 68.4%      | 14.27                                          |

**1(C)**

| strain | no. barcoded reads | no. reads with transposon and flanking sequence | no. reads mapped to mm8 reference genome | mapping rate | no. ERVK loci (including single read loci) | fold coverage |
|--------|--------------------|-------------------------------------------------|------------------------------------------|--------------|--------------------------------------------|---------------|
| A/J    | 85,932             | 60,865                                          | 47,290                                   | 77.7%        | 4,827                                      | 9.80          |
| C57    | 92,011             | 66,220                                          | 55,636                                   | 84.0%        | 5,204                                      | 10.69         |
| CAST   | 99,383             | 73,211                                          | 45,237                                   | 61.8%        | 3,650                                      | 12.39         |
| MOLF   | 95,463             | 72,523                                          | 40,055                                   | 55.2%        | 3,867                                      | 10.36         |
| SPRET  | 98,147             | 68,683                                          | 31,761                                   | 46.2%        | 2,910                                      | 10.91         |
| WSB    | 94,329             | 67,455                                          | 46,822                                   | 69.4%        | 4,611                                      | 10.15         |

**Supp. Table 1. Optimizing identification of IAP ERV subfamily integrants in the reference genome.** (A) We compared identification rates of “known” ERV integrants in the reference genome, using various restriction enzymes and primers annealing within the ERV long terminal repeats (LTRs). In the first two trial runs (#1 and

2), we used single restriction enzymes and a non-degenerate primer 1, i.e. DES3356, 5'-AGATTYTGCTGTGGTGTCTTC-3', which targets the long terminal repeat of young ERVs, i.e. IAPLTR1 elements. These two runs each identified less than 700 IAPLTR loci, in comparison with the B6 reference genome, which contains 1,770 IAPLTR1s. In runs #3 and 4, we prepared genomic DNA fragments separately with three restriction enzymes to reduce false negatives caused by restriction site bias. We also used degenerate primer 2, DES3355, 5'-CTTTGCCGCAGAAGRWTCTG-3' to amplify a wider range of ERV IAP subfamilies with various LTRs. Combining the third and fourth runs, 5,204 IAP loci were identified in the reference genome.

**(B)** Using a combination of restriction enzymes for genomic DNA digestion and degenerate primers to detect various ERV IAP subfamilies by the transposon junction assay, we identified over 92% of possible young IAP\_LTR1 elements in the reference B6 mouse genome. Overall fold coverage exceeded 14 sequence traces per detected ERV. See Supp. Methods for more detail about the primers used.

**(C)** Thousands of ERV elements were identified in various diverse, previously unsequenced mouse strains at >10-fold sequence coverage. In most cases, a large majority of sequence reads from these diverse genomes could be mapped to the B6 reference genome. For example, out of 92,011 barcoded pyrosequencing traces generated from C57BL/6J mice with a single degenerate primer, 66,220 contained both transposon and flanking mappable genomic sequences, thereby allowing identification of both the ERV integrant's family and its insertion boundary for over 5,000 individual ERV loci.

Supp. Table 2

| chr | coordinate | A/J | B6  | CAST | MOLF | SPRET | WSB |
|-----|------------|-----|-----|------|------|-------|-----|
| 1   | 6420461    | 2   | 22  | 0    | 3    | 0     | 0   |
| 2   | 3400785    | 17  | 58  | 0    | 32   | 0     | 0   |
| 3   | 146027772  | 0   | 10  | 0    | 0    | 0     | 6   |
| 4   | 14569445   | 0   | 18  | 0    | 26   | 0     | 0   |
| 5   | 20747238   | 49  | 220 | 0    | 0    | 0     | 42  |
| 6   | 4318314    | 0   | 95  | 0    | 0    | 0     | 0   |
| 9   | 85859472   | 0   | 150 | 0    | 0    | 0     | 22  |
| 10  | 32628688   | 58  | 224 | 0    | 0    | 0     | 31  |
| 15  | 3906390    | 30  | 34  | 0    | 0    | 0     | 13  |
| 16  | 15110111   | 73  | 273 | 0    | 0    | 0     | 27  |
| 17  | 52476255   | 5   | 9   | 0    | 0    | 0     | 3   |
| 18  | 55436483   | 0   | 26  | 0    | 0    | 0     | 18  |
| 19  | 32514954   | 47  | 55  | 0    | 0    | 0     | 61  |
| X   | 121690432  | 0   | 25  | 0    | 0    | 0     | 0   |
| 3   | 72875729   | 0   | 0   | 8    | 8    | 0     | 0   |
| 4   | 53131105   | 0   | 0   | 72   | 0    | 0     | 0   |
| 5   | 70236080   | 0   | 0   | 0    | 16   | 0     | 25  |
| 6   | 47962182   | 0   | 0   | 23   | 24   | 0     | 0   |
| 7   | 76310444   | 10  | 0   | 0    | 0    | 0     | 7   |
| 8   | 25765694   | 13  | 0   | 0    | 0    | 0     | 1   |
| 9   | 104148403  | 0   | 0   | 0    | 0    | 30    | 0   |
| 10  | 16414015   | 0   | 0   | 92   | 0    | 0     | 0   |
| 11  | 12093540   | 0   | 0   | 0    | 29   | 0     | 0   |
| 12  | 53281304   | 58  | 0   | 0    | 0    | 0     | 0   |
| 17  | 36502445   | 0   | 0   | 74   | 0    | 0     | 54  |
| 18  | 59811943   | 36  | 0   | 0    | 0    | 0     | 22  |
| 19  | 37514345   | 23  | 0   | 0    | 0    | 0     | 3   |
| X   | 118057415  | 0   | 0   | 27   | 0    | 0     | 0   |

|  | 454       | PCR       | Sanger    |
|--|-----------|-----------|-----------|
|  | integrant | integrant | integrant |
|  | empty     | empty     | empty     |
|  | empty     | empty     | integrant |
|  | empty     | N.D.      | empty     |
|  | empty     | N.D.      | integrant |

**Supp. Table 2. Identification and validation of ERV integrants in diverse mouse strains.** Using the transposon junction assay (**Supp. Fig. 1**), we mapped young polymorphic ERV integrants in various strains to chromosomal coordinates (relative to the reference B6 genome, mm8). Presented here are chromosomal coordinates for selected ERV integrants whose presence or absence was called by (*key, colors*) 454 sequencing, PCR validation and Sanger WGS sequencing (Keane et al. 2011). The results show that 454 reads from the transposon junction assay accurately call presence/absence status of tested ERV integrants. *Numbers*: counts of supporting 454 sequencing platform traces from the transposon junction assay, per strain. *N.D.*, not done due to PCR amplicon failure (likely due to genome polymorphisms).

Supp. Table 3(A)

| chr: coord mm8            | gene locus        | strand | A/J | AKR/J | BALB/cJ | BALB/cByJ | B7R/T1(+) | CAST/EJ | C57BL/6J | C3H/HeJ | D8A/2J | FVB/NJ | KK/rlJ | MOLFEJ | NOD/LtJ | NZB/BINJ | NZW/N.eJ | 129/SvImJ | 129X/SvJ | PWD/PhJ | SPRET/EJ | SWR/J | WSB/EJ |
|---------------------------|-------------------|--------|-----|-------|---------|-----------|-----------|---------|----------|---------|--------|--------|--------|--------|---------|----------|----------|-----------|----------|---------|----------|-------|--------|
| chr1:58267894-58275017    | Aox3l1 intron 20  | AS     | +   | +     | +       | +         | +         | +       | +        | +       | +      | +      | +      |        |         |          |          | +         | +        |         |          |       | +      |
| chr1:60320055-60320379    | Cyp20a1 intron 8  | AS     | +   | +     | +       | +         | +         | +       | +        | +       | +      | +      | +      |        | +       | +        | +        | +         | +        |         |          | +     | +      |
| chr2:93625620-93632699    | Ext2 5 prime      | sense  |     |       |         |           |           | +       |          |         |        |        |        |        | +       |          |          |           |          |         |          |       |        |
| chr2:112349800-112354621  | Aven intron 2     | AS     |     | +     |         |           | +         | +       |          |         |        |        |        |        |         |          |          |           |          |         |          |       | +      |
| chr3:123463783-123468157  | Prss12 intron 2   | AS     |     | +     |         |           | +         | +       |          | +       | +      | +      |        | +      |         | +        | +        | +         |          |         |          | +     | +      |
| chr4:94305261-94311531    | Tek intron 7      | AS     |     |       |         |           | +         | +       |          | +       | +      | +      |        |        | +       |          |          |           |          |         |          |       |        |
| chr4:117681292-117688517  | Jmjd2a 5 prime    | sense  |     |       |         |           |           | +       |          |         |        |        |        |        |         |          |          |           |          |         |          | +     |        |
| chr4:120433792-120440897  | Zfp69 intron2     | sense  |     |       |         |           |           | +       |          |         |        | +      | +      |        |         |          |          |           |          | +       |          |       |        |
| chr6:71885312-71889893    | Rpo1-4 intron 20  | AS     | +   |       | +       | +         | +         | +       |          |         |        | +      |        |        |         | +        | +        | +         | +        |         |          | +     |        |
| chr7:55814787-55821973    | Nipa2 intron 1    | AS     |     |       |         |           |           | +       |          |         |        |        |        |        |         |          |          |           |          |         |          |       |        |
| chr7:56204435-56208793    | p intron18        | sense  | +   | +     |         |           | +         | +       | +        |         |        | +      |        |        | +       | +        |          | +         |          |         |          | +     |        |
| chr8:24016713-24023839    | Slc20a2 intron5   | sense  |     |       |         |           |           | +       |          |         |        |        |        |        |         |          |          |           |          |         |          |       |        |
| chr9:121171076-121177181  | Trak1 intron1     | AS     | +   |       | +       | +         | +         | +       | +        |         |        | +      | +      |        | +       | +        | +        | +         | +        | +       |          | +     |        |
| chr9:121255107-121262206  | Trak1 intron 3    | AS     |     |       |         |           | +         | +       |          |         |        | +      |        |        | +       | +        | +        | +         | +        |         |          | +     |        |
| chr10:24375847-24381032   | Enpp1 intron 1    | AS     |     |       |         |           |           | +       |          | +       |        |        |        |        |         |          |          |           |          |         |          |       |        |
| chr11:6041513-6048633     | Nudcd3 intron3    | sense  |     |       |         |           |           | +       |          | +       |        |        |        |        |         |          |          |           |          |         |          |       |        |
| chr11:51281139-51285478   | Col23a1 intron2   | sense  | +   | +     | +       | +         | +         | +       | +        |         |        | +      |        |        |         |          |          | +         | +        |         |          |       |        |
| chr11:74356372-74361593   | Garnl4 intron 2   | AS     |     |       |         |           |           | +       |          |         |        | +      |        |        |         |          |          |           |          |         |          |       | +      |
| chr12:32613270-32617632   | Prkar2b intron 2  | AS     |     |       |         |           |           | +       |          | +       | +      | +      |        |        | +       | +        | +        |           |          |         |          | +     |        |
| chr12:57665867-57670188   | Slc25a21 intron6  | sense  | +   | +     | +       | +         |           | +       | +        | +       | +      | +      | +      |        | +       |          |          |           |          |         |          |       |        |
| chr13:56722503-56729600   | Smad5 intron 1    | AS     |     | +     |         |           |           | +       |          |         |        | +      | +      |        |         |          |          |           |          |         |          |       |        |
| chr13:63166458-63173288   | AK141931 intron5  | AS     |     | +     |         |           |           | +       | +        |         |        |        |        |        |         |          |          |           |          |         |          |       |        |
| chr13:63227285-63232431   | AK141931 intron10 | AS     |     | +     | +       |           |           | +       | +        |         |        |        |        |        |         |          |          |           |          |         |          |       |        |
| chr14:33212947-33218236   | Mmrn2 intron 1    | AS     | +   | +     | +       | +         | +         | +       | +        |         |        | +      | +      |        |         | +        |          |           |          |         |          |       |        |
| chr14:116061928-116068529 | Gpc6 intron2      | sense  |     |       |         |           |           | +       |          |         |        |        |        |        | +       |          |          |           |          |         |          |       |        |
| chr15:86140030-86145361   | Tbc1d22a intron 8 | AS     | +   | +     | +       | +         | +         | +       | +        | +       | +      | +      | +      | +      | +       | +        | +        | +         | +        |         |          | +     | +      |
| chr16:32067824-32073088   | Lrrc33 intron 2   | AS     |     |       |         |           |           | +       |          |         |        |        |        |        |         |          |          | +         |          |         |          |       |        |
| chr16:36684294-36689592   | Slc15a2 intron7   | sense  |     |       |         |           |           | +       |          |         | +      |        |        |        |         |          | +        | +         | +        |         |          | +     |        |
| chr17:12127053-12131538   | Map3k4 intron 1   | AS     |     | +     | +       | +         | +         | +       |          |         | +      |        |        | +      | +       | +        | +        | +         |          |         |          |       |        |
| chr19:42399286-42403622   | Crtac1 intron 2   | AS     |     | +     |         |           | +         | +       | +        |         | +      |        |        |        |         |          | +        | +         |          |         |          | +     |        |
| chrX:69194673-69201828    | Nsdhl intron3     | sense  |     |       |         |           | +         | +       |          |         |        |        | +      |        |         | +        | +        | +         | +        |         |          |       |        |
| chrX:146918864-146925949  | Phf8 intron 13    | AS     |     | +     |         |           | +         | +       | +        | +       |        |        |        |        |         | +        | +        |           |          |         |          |       |        |

Supp. Table 3(B)

| chr. coord.      | rep. class  | gene     | AJ | AKR/J | BALB/cByJ | BALB/cJ | BTBR T(+) | CASr1EU | C37BL/6J | C3HHeJ | DBA/2J | FVB/NJ | KK/HJ | MOLFEU | MOD/LJ | N2B/BINJ | N2W1acJ | T2851/SyHmJ | T2851/SyJ | PWD/PhJ | SPT/TEU | SWR/J | W33B/EU |
|------------------|-------------|----------|----|-------|-----------|---------|-----------|---------|----------|--------|--------|--------|-------|--------|--------|----------|---------|-------------|-----------|---------|---------|-------|---------|
| chr1:9128701     | IAPLTR1a_Mm | Sntg1    | +  |       | +         | +       |           |         |          |        |        | +      | +     | +      |        |          |         |             |           | poly    |         | +     |         |
| chr2:79157470    | IAPLTR2_Mm  | Cerkl    | +  | +     | +         | +       |           |         |          | +      | +      |        | +     |        |        |          |         |             |           |         |         |       |         |
| chr3:75705017    | IAPLTR1_Mm  | Serpini1 |    |       |           |         |           |         |          |        | +      |        |       |        | +      |          |         |             |           |         |         |       |         |
| chr4:123292951   | IAPLTR1_Mm  | Rhbdl2   |    |       |           |         |           |         |          |        |        |        |       |        |        |          |         | +           | +         | +       |         |       |         |
| chr5:73814056    | IAPLTR1_Mm  | Dcun1d4  | +  |       | +         | +       | poly      |         |          |        |        | +      |       |        |        |          |         | +           |           |         |         |       |         |
| chr6:54884609    | IAPLTR1a_Mm | Nod1     | +  | +     | +         | +       | +         |         |          | +      | +      | +      | +     |        | +      | +        | +       | +           | +         |         | poly    | +     |         |
| chr7:75733735    | IAPLTR1a_Mm | Kihl25   | +  | +     | +         | +       | +         |         |          | +      | +      | +      |       |        | +      | +        |         | +           | +         |         |         | +     | +       |
| chr8:84929640    | IAPLTR2b    | Inpp4b   | +  |       |           |         |           |         |          | +      | +      |        | +     |        |        |          |         |             |           | poly    |         | +     |         |
| chr9:50294821    | IAPLTR2b    | Bcdo2    | +  |       | +         | +       |           |         |          | +      | +      |        |       |        | +      |          |         |             |           |         |         |       |         |
| chr9:101947474   | IAPLTR1_Mm  | Ephb1    | +  | +     | +         | +       |           |         |          | +      | poly   |        |       |        | +      |          |         | +           | +         | +       |         |       |         |
| chr10:9355860    | IAPLTR2_Mm  | Samd5    | +  | +     | +         | +       | +         |         |          | +      |        |        |       |        | +      |          |         |             | +         |         |         |       | +       |
| chr11:75966043   | IAPLTR1a_Mm | Vps53    | +  | +     | +         | +       | +         | poly    |          | +      | +      | +      | +     |        | +      | +        |         | +           | +         | poly    | poly    | +     |         |
| chr11:107773658  | IAPLTR1_Mm  | Prkca    | +  | +     | +         | +       | +         |         |          | +      | +      | +      | +     | +      | +      | +        | +       | +           | +         |         |         | +     |         |
| chr12:21436945   | IAPLTR2_Mm  | Ddef2    | +  | +     | +         | +       |           |         |          |        |        |        |       |        |        |          |         |             |           |         |         |       |         |
| chr12:53469442   | IAPLTR2_Mm  | Arhgap5  |    |       |           |         |           |         |          |        |        |        |       |        |        | +        |         | +           | +         | +       |         |       |         |
| chr13:76986602   | IAPLTR2_Mm  | Mctp1    | +  | +     | +         | +       | +         | +       |          | +      | +      | +      | +     |        | +      | +        | +       | +           | +         |         |         | +     | +       |
| chr14:65228560   | IAPLTR1_Mm  | Ptk2b    |    |       |           |         |           |         |          | +      | +      |        |       |        |        |          |         | +           | +         |         |         |       |         |
| chr15:53531671   | IAPLTR1_Mm  | Samd12   | +  |       |           |         |           |         |          |        | +      | +      |       |        |        |          |         |             |           | poly    |         |       |         |
| chr16:34964522   | IAPLTR1a_Mm | Ptlib    |    |       |           |         |           |         |          | +      | +      |        |       |        |        |          |         |             |           |         |         |       |         |
| chr17:24006885   | IAPLTR1_Mm  | Abca17   | +  | +     |           |         | +         |         |          | +      | +      |        | +     |        | +      | +        | +       | +           | +         |         |         | +     |         |
| chr19:22461274   | IAPLTR1a_Mm | Trpm3    | +  | +     | +         | +       | +         |         |          | +      | +      | +      |       |        |        |          |         | +           | +         |         |         | +     |         |
| chrX:73839228    | IAPLTR1_Mm  | Tbl1x    | +  | +     | +         | +       |           |         |          | +      | +      | +      | +     |        | +      | +        | +       | +           | +         |         |         | +     |         |
| Erec3 intron3    |             | Erec3    |    |       |           |         |           |         |          |        |        |        |       |        |        |          |         | +           |           |         |         |       |         |
| AK008696 intron2 |             | AK008696 |    |       |           |         | +         |         |          | +      |        |        |       | +      | +      | +        | +       | +           | +         | +       |         |       |         |

Supp. Table 3(C)

| name                     | gene     | rep_class   | AJ | AKR/J | BALB/cByJ | BALB/cJ | BTBR T(+) | CAST/EiJ | C3H/HeJ | C57BL/6J | DBA/2J | FVB/NJ | KK/HIJ | MOLF/EiJ | NOD/LtJ | NZB/BINJ | NZW/LacJ | 129S1/SvImJ | 129X1/SvJ | PWD/PhJ | SPRET/EiJ | SWR/J | WSB/EiJ |
|--------------------------|----------|-------------|----|-------|-----------|---------|-----------|----------|---------|----------|--------|--------|--------|----------|---------|----------|----------|-------------|-----------|---------|-----------|-------|---------|
| chr1:37718431-37723143   | Tsga10   | IAPLTR1a_Mm | +  | +     | +         | +       | +         | +        | +       | +        | +      | +      | +      | +        | +       | +        | +        | +           | +         | +       | +         | +     | +       |
| chr2:146617817-146618285 | Gm114    | IAPLTR2_Mm  | +  | +     | +         | +       | +         | +        | +       | +        | +      | +      | +      | +        | +       | +        | +        | +           | +         | +       | +         | +     | +       |
| chr3:9714241-9721394     | Pag1     | IAPLTR1a_Mm | +  | +     | +         | +       | +         | +        | +       | +        | +      | +      | +      | +        | +       | +        | +        | +           | +         | +       | +         | +     | +       |
| chr4:86608399-86608809   | Slc24a2  | IAPLTR2a    | +  | +     | +         | +       | +         | +        | +       | +        | +      | +      | +      | +        | +       | +        | +        | +           | +         | +       | +         | +     | +       |
| chr5:5124695-5125152     | Pf1k1    | IAPLTR2_Mm  | +  | +     | +         | +       | +         | +        | +       | +        | +      | +      | +      | +        | +       | +        | +        | +           | +         | +       | +         | +     | +       |
| chr6:122921491-122928070 | Clec4a3  | IAPLTR1a_Mm | +  | +     | +         | +       | +         | +        | +       | +        | +      | +      | +      | +        | +       | +        | +        | +           | +         | +       | +         | +     | +       |
| chr7:24286926-24292893   | Zfp575   | IAPLTR1_Mm  | +  | +     | +         | +       | +         | +        | +       | +        | +      | +      | +      | +        | +       | +        | +        | +           | +         | +       | +         | +     | +       |
| chr8:27337001-27344085   | Kcnu1    | IAPLTR1_Mm  | +  | +     | +         | +       | +         | +        | +       | +        | +      | +      | +      | +        | +       | +        | +        | +           | +         | +       | +         | +     | +       |
| chr9:13504633-13508798   | Mtmr2    | IAPEY_LTR   | +  | +     | +         | +       | +         | +        | +       | +        | +      | +      | +      | +        | +       | +        | +        | +           | +         | +       | +         | +     | +       |
| chr10:41640986-41641416  | Armc2    | IAPLTR2_Mm  | +  | +     | +         | +       | +         | +        | +       | +        | +      | +      | +      | +        | +       | +        | +        | +           | +         | +       | +         | +     | +       |
| chr11:54420003-54427121  | Rapgef6  | IAPLTR1a_Mm | +  | +     | +         | +       | +         | +        | +       | +        | +      | +      | +      | +        | +       | +        | +        | +           | +         | +       | +         | +     | +       |
| chr12:81336111-81343260  | Wdr22    | IAPLTR1_Mm  | +  | +     | +         | +       | +         | +        | +       | +        | +      | +      | +      | +        | +       | +        | +        | +           | +         | +       | +         | +     | +       |
| chr13:8468880-8474087    | Adarb2   | IAPLTR1a_Mm | +  | +     | +         | +       | +         | +        | +       | +        | +      | +      | +      | +        | +       | +        | +        | +           | +         | +       | +         | +     | +       |
| chr14:9748652-9748988    | Fhit     | IAPEY2_LTR  | +  | +     | +         | +       | +         | +        | +       | +        | +      | +      | +      | +        | +       | +        | +        | +           | +         | +       | +         | +     | +       |
| chr15:53296582-53296682  | Samd12   | IAPLTR1_Mm  | +  | +     | +         | +       | +         | +        | +       | +        | +      | +      | +      | +        | +       | +        | +        | +           | +         | +       | +         | +     | +       |
| chr16:33766985-33772335  | Itgb5    | IAPLTR1_Mm  | +  | +     | +         | +       | +         | +        | +       | +        | +      | +      | +      | +        | +       | +        | +        | +           | +         | +       | +         | +     | +       |
| chr17:10941209-10948368  | Park2    | IAPLTR1_Mm  | +  | +     | +         | +       | +         | +        | +       | +        | +      | +      | +      | +        | +       | +        | +        | +           | +         | +       | +         | +     | +       |
| chr18:71755798-71756290  | Dcc      | IAPLTR2_Mm  | +  | +     | +         | +       | +         | +        | +       | +        | +      | +      | +      | +        | +       | +        | +        | +           | +         | +       | +         | +     | +       |
| chr19:34197151-34204254  | Ankrd22  | IAPLTR1a_Mm | +  | +     | +         | +       | +         | +        | +       | +        | +      | +      | +      | +        | +       | +        | +        | +           | +         | +       | +         | +     | +       |
| chrX:133035714-133042830 | Il1rapl2 | IAPLTR1_Mm  | +  | +     | +         | +       | +         | +        | +       | +        | +      | +      | +      | +        | +       | +        | +        | +           | +         | +       | +         | +     | +       |

Supp. Table 3. Identification and validation of ERV integrants in diverse mouse strains.

(A-C) Using PCR assays developed for individual target sites, we determined the presence (*solid pink*, + symbols) or absence (*white*) of a collection of 76 intragenic integrants identified in (A, C) reference or (B) non-reference genomes at indicated chromosomal loci (rows) in 21 mouse strains and species (columns). Of the 21 genomic DNA samples assayed here, 16 strains overlap (*underlined*) with Perlegen SNP sets (A\_J, AKR\_J, BALB\_cJ, BALB\_cByJ, BTBR, C3H\_HeJ, C57BL\_6J, CAST\_EiJ, DBA\_2J, FVB\_NJ, KK\_HIJ, MOLF\_EiJ, NOD\_LtJ, NZB\_BINJ, NZW\_LacJ, 129S1\_SvImJ, 129X1\_SvJ, PWD\_PhJ, SPRET\_EiJ, SWR\_J, WSB\_EiJ) (Frazer et al. 2007). *Rep\_class*, ERV subfamily defined using RepeatMasker classes; *poly*, flanking genomic polymorphisms precluded PCR assay so ERV presence/absence status is unknown. (A) In addition to validating their presence in the reference genome, we found these 32 genomic ERVs are completely missing from orthologous target sites in SPRET/EiJ and CAST/EiJ, and mostly absent from MOLF/EiJ species. (B) 24 non-reference ERV integrants (not in the B6 genome) were identified in other mouse lineages as indicated. The results validated the ERVs' absence



from orthologous loci in the reference genome (B6 DNA) as expected. (C) In addition to validating their presence in the reference genome (B6 DNA) as expected, we found these 20 genomic ERVs are mostly conserved at orthologous positions in diverse mouse lineages but still are mostly excluded from the most divergent strains MOLF/EiJ, PWD/PhJ and SPRET/EiJ. One ERV integrant within *Park2*, on chr. 17, is conserved in all strains assayed.

Supp. Table 4

| ID no. | genotype at <i>Slc15a2</i> | dam     | sire    | generation |
|--------|----------------------------|---------|---------|------------|
| B6     | ERV+/+                     | B6      | B6      | pool       |
| 2716   | ERV+/+                     | B6      | CASTxB6 | F2         |
| 2717   | ERV+/+                     | B6      | CASTxB6 | F2         |
| 2781   | ERV+/+                     | CASTxB6 | B6      | F2         |
| 2903   | ERV+/+                     | B6      | B6xCAST | F2         |
| 2573   | ERV+/-                     | B6      | CAST    | F1         |
| 2574   | ERV+/-                     | B6      | CAST    | F1         |
| 2714   | ERV+/-                     | B6      | B6xCAST | F2         |
| 2719   | ERV+/-                     | B6      | CASTxB6 | F2         |
| 2815   | ERV+/-                     | CASTxB6 | CAST    | F2         |
| 2650   | ERV-/+                     | CAST    | CASTxB6 | F2         |
| 2652   | ERV-/+                     | CAST    | CASTxB6 | F2         |
| 2668   | ERV-/+                     | CAST    | B6      | F1         |
| 2669   | ERV-/+                     | CAST    | B6      | F1         |
| 2670   | ERV-/+                     | CAST    | B6      | F1         |
| 2671   | ERV-/+                     | CAST    | B6      | F1         |
| 2705   | ERV-/+                     | CAST    | B6xCAST | F2         |
| 2754   | ERV-/+                     | CAST    | CASTxB6 | F2         |
| 2757   | ERV-/+                     | CAST    | CASTxB6 | F2         |
| 2702   | ERV-/-                     | CAST    | B6xCAST | F2         |
| 2703   | ERV-/-                     | CAST    | B6xCAST | F2         |
| 2755   | ERV-/-                     | CAST    | CASTxB6 | F2         |
| 2816   | ERV-/-                     | CASTxB6 | CAST    | F2         |
| CAST   | ERV-/-                     | CAST    | CAST    | pool       |

**Supp. Table 4. ERV genotypes of individual mice assayed for *Slc15a2* expression.** Transcript levels in F1, F2 and wildtype mice were quantified using qRT-PCR (**Fig. 6D** and **Supp. Fig. 5**). Genotypes were assayed using locus-specific PCR primers to amplify the empty or occupied ERV<sub>*Slc15a2*</sub> target site. *Genotype at Slc15a2*, ERV genotypes are described using the convention *ERV*<sub>*x/y*</sub>, where *x* is the maternal haplotype and *y* is the paternal.

| gene_name     | gb_acc    | chr. | gene_start | gene_stop | ERV_start | ERV_stop  | rep_name    | poly | dist. | orient. |
|---------------|-----------|------|------------|-----------|-----------|-----------|-------------|------|-------|---------|
| 1200014J11Rik | AK163780  | 11   | 72864064   | 72874857  | 72879658  | 72880061  | IAPLTR2a    | U    | 4801  | sense   |
| 2010015L04Rik | AK008257  | 4    | 154252989  | 154259787 | 154265481 | 154265848 | IAPLTR1_Mm  | U    | 5694  | sense   |
| 201011101Rik  | AK008397  | 13   | 63161067   | 63225106  | 63227284  | 63232434  | IAPLTR1_Mm  | Y    | 2178  | AS      |
| 2510009E07Rik | AK053253  | 16   | 21605836   | 21608592  | 21597627  | 21598173  | IAPLTR2_Mm  | U    | 7663  | AS      |
| 3300002I08Rik | AK013537  | 2    | 150035691  | 150054185 | 150032643 | 150032972 | IAPLTR2b    | N    | 2719  | AS      |
| 4930430F08Rik | AK085292  | 10   | 100016189  | 100018936 | 100008665 | 100013442 | IAPLTR1a_Mm | U    | 2747  | AS      |
| 6720457D02Rik | AK030471  | 13   | 62564232   | 62568213  | 62558170  | 62560723  | IAPLTR2_Mm  | N    | 3509  | AS      |
| Abcg3         | AK037614  | 5    | 105214356  | 105222934 | 105211401 | 105211692 | IAPEY3_LTR  | U    | 2664  | AS      |
| Acly          | AK078680  | 11   | 100311043  | 100312521 | 100310288 | 100310716 | IAPLTR2a    | U    | 327   | AS      |
| Adams3        | AK031900  | 5    | 90909430   | 90958533  | 90905920  | 90906342  | IAPLTR2_Mm  | Y    | 3088  | AS      |
| Agbl4         | AK016502  | 4    | 109895663  | 111064942 | 111069681 | 111075088 | IAPLTR1_Mm  | Y    | 4739  | sense   |
| Akr1c14       | AK086887  | 13   | 4058817    | 4060269   | 4065480   | 4069155   | IAPLTR1_Mm  | U    | 5211  | AS      |
| Angpt1        | AK012027  | 15   | 42326300   | 42506987  | 42323062  | 42323394  | IAPEY3_LTR  | U    | 2906  | sense   |
| Arfge2        | AK087574  | 2    | 166496781  | 166500741 | 166503404 | 166508674 | IAPLTR1_Mm  | U    | 2663  | AS      |
| Asb3          | AK038897  | 11   | 30854447   | 30929760  | 30930229  | 30930744  | IAPLTR2_Mm  | U    | 469   | AS      |
| Atp6v1h       | AK081492  | 1    | 5073244    | 5089858   | 5097588   | 5099400   | IAPLTR2b    | N    | 7730  | AS      |
| Bmx           | AK080038  | X    | 159564486  | 159602297 | 159558699 | 159559144 | IAPLTR2_Mm  | U    | 5342  | AS      |
| Ccdc15        | BC032924  | 9    | 37091081   | 37098059  | 37081040  | 37088148  | IAPLTR1_Mm  | U    | 2933  | AS      |
| Ccdc46        | AK160317  | 11   | 108241366  | 108288883 | 108291117 | 108291609 | IAPLTR2_Mm  | Y    | 2234  | sense   |
| Cdk5rap1      | AK136570  | 2    | 154052691  | 154064172 | 154045704 | 154051034 | IAPLTR1_Mm  | Y    | 1657  | AS      |
| Cenpq         | AK086880  | 17   | 40393497   | 40396699  | 40389137  | 40389464  | IAPEY_LTR   | U    | 4033  | sense   |
| Chl1          | AK082640  | 6    | 103476734  | 103610838 | 103613692 | 103614151 | IAPLTR2_Mm  | U    | 2854  | sense   |
| Cmah          | AK145110  | 13   | 24424192   | 24478028  | 24478076  | 24478394  | IAPLTR2b    | U    | 48    | AS      |
| Cog6          | AK048966  | 3    | 53083728   | 53105139  | 53082224  | 53082600  | IAPLTR2_Mm  | U    | 1128  | AS      |
| Col4a4        | AK142553  | 1    | 82388196   | 82465748  | 82380063  | 82385013  | IAPLTR1a_Mm | N    | 3183  | AS      |
| Ctsp2         | AK161564  | X    | 158245342  | 158322634 | 158322738 | 158329862 | IAPLTR1_Mm  | U    | 104   | AS      |
| Cyp20a1       | AK020848  | 1    | 60287868   | 60317253  | 60320054  | 60320379  | IAPLTR2b    | N    | 2801  | AS      |
| Dcp1b         | AK216011  | 6    | 119141009  | 119166481 | 119168643 | 119169014 | IAPLTR2a    | U    | 2162  | AS      |
| Dctn4         | AK089264  | 18   | 60651596   | 60653341  | 60653737  | 60659091  | IAPLTR1_Mm  | U    | 396   | AS      |
| Diap3         | AK166225  | 14   | 85907485   | 85972890  | 85900107  | 85900426  | IAPLTR2b    | Y    | 7059  | AS      |
| Dnahc1        | Z83815    | 14   | 30114986   | 30133504  | 30105973  | 30106433  | IAPLTR2_Mm  | U    | 8553  | AS      |
| Dnahc7b       | AK143375  | 1    | 46089242   | 46123263  | 46125427  | 46125782  | IAPLTR1_Mm  | Y    | 2164  | sense   |
| Dph5          | AK045548  | 3    | 115880197  | 115893206 | 115901130 | 115906444 | IAPLTR1_Mm  | U    | 7924  | sense   |
| Dsg2          | BC020144  | 18   | 20701255   | 20725919  | 20727208  | 20727348  | IAP-d       | N    | 1289  | AS      |
| Did1          | AK010822  | 2    | 144291456  | 144438366 | 144442330 | 144442744 | IAPLTR2a    | U    | 3964  | sense   |
| Dym           | AK081242  | 18   | 75144145   | 75231773  | 75232462  | 75233045  | IAPLTR2_Mm  | U    | 689   | AS      |
| E130309F12Rik | AK053451  | 4    | 49080555   | 49323369  | 49329019  | 49329345  | IAPEY3_LTR  | U    | 5650  | AS      |
| Enpp6         | AK014741  | 8    | 48567747   | 48582293  | 48582879  | 48588122  | IAPLTR1_Mm  | Y    | 586   | AS      |
| Epb4_1/2      | AJ539144  | 10   | 25131002   | 25202494  | 25207244  | 25207663  | IAPLTR2_Mm  | N    | 4750  | AS      |
| Eps15         | AK018619  | 4    | 108821843  | 108823907 | 108829603 | 108830465 | IAPLTR2_Mm  | U    | 5696  | AS      |
| Exoc6         | AK082881  | 19   | 37615582   | 37674249  | 37682580  | 37689630  | IAPLTR1a_Mm | Y    | 8331  | AS      |
| Fancd2        | AK019136  | 6    | 113497480  | 113504496 | 113509418 | 113509834 | IAPLTR2a    | N    | 4922  | AS      |
| Galk2         | AK053002  | 2    | 125557708  | 125638794 | 125648615 | 125653155 | IAPEY_LTR   | U    | 9821  | AS      |
| Galn110       | AK082774  | 11   | 57541868   | 57543106  | 57551061  | 57551408  | IAPLTR2a    | U    | 7955  | sense   |
| Gimap5        | AK054194  | 6    | 48675884   | 48678212  | 48680492  | 48680874  | IAPEY_LTR   | N    | 2280  | AS      |
| Gm4979        | AB470966  | 2    | 149909539  | 149931030 | 149931223 | 149931551 | IAPLTR2b    | U    | 193   | AS      |
| Golga3        | AK171773  | 5    | 110417161  | 110426802 | 110435195 | 110440153 | IAPLTR2a    | Y    | 8393  | AS      |
| Gpsm1         | AK192364  | 2    | 26147466   | 26149332  | 26155230  | 26160484  | IAPLTR1_Mm  | U    | 5898  | AS      |
| Iars2         | AK043729  | 1    | 187012633  | 187030166 | 187004285 | 187007297 | IAPLTR2_Mm  | U    | 5336  | AS      |
| Ifi44         | AK085407  | 3    | 151683078  | 151687333 | 151678041 | 151678507 | IAPLTR2_Mm  | U    | 4571  | AS      |
| Iqca          | AK015512  | 1    | 91929185   | 91984572  | 91921096  | 91921535  | IAPLTR2_Mm  | U    | 7650  | sense   |
| Irak3         | AK014783  | 10   | 119568035  | 119604647 | 119561872 | 119562209 | IAPLTR3     | U    | 5826  | sense   |
| Irgb3bp       | AK088352  | 4    | 99319334   | 99321176  | 99310396  | 99310885  | IAPLTR2_Mm  | U    | 8449  | AS      |
| Katnal1       | AK049620  | 5    | 149196074  | 149239349 | 149186946 | 149187178 | IAPEY3_LTR  | N    | 8896  | sense   |
| Khl113        | AK045102  | X    | 22519152   | 22522022  | 22509895  | 22510337  | IAPLTR2_Mm  | U    | 8815  | AS      |
| Lama3         | AK138740  | 18   | 12647734   | 12690582  | 12696874  | 12697194  | IAPEY2_LTR  | N    | 6292  | AS      |
| Letm1         | AK185302  | 5    | 34078436   | 34079443  | 34076522  | 34076997  | IAPLTR2_Mm  | U    | 1439  | AS      |
| Mapk4         | AK138531  | 7    | 74094101   | 74096823  | 74084587  | 74084957  | IAPEY2_LTR  | U    | 9144  | AS      |
| Me3           | AK036221  | 7    | 89507725   | 89518865  | 89525384  | 89529803  | IAPLTR1a_Mm | U    | 6519  | AS      |
| Me3           | AK035780  | 7    | 89611922   | 89693625  | 89693986  | 89701186  | IAPLTR1_Mm  | Y    | 361   | sense   |
| Mitf10        | BC069988  | 2    | 17982437   | 18043975  | 18053064  | 18053420  | IAPLTR1_Mm  | U    | 9089  | AS      |
| Myom1         | AK041025  | 17   | 70991252   | 70997958  | 71002830  | 71003288  | IAPLTR2_Mm  | U    | 4872  | AS      |
| Ophn1         | AK039304  | X    | 94914917   | 95093744  | 94911223  | 94911608  | IAPEY2_LTR  | U    | 3309  | AS      |
| Orai2         | AK195764  | 5    | 136446280  | 136455211 | 136440305 | 136444837 | IAPLTR1a_Mm | U    | 1443  | AS      |
| Otoa          | AK158280  | 7    | 120909532  | 120951916 | 120952564 | 120952901 | IAPEY2_LTR  | U    | 648   | AS      |
| Paqr3         | BC050248  | 5    | 97342443   | 97351898  | 97341286  | 97341616  | IAPEY3_LTR  | U    | 827   | AS      |
| Parp4         | AK054229  | 14   | 55526766   | 55601337  | 55608421  | 55608739  | IAPLTR2b    | U    | 7084  | sense   |
| Phc3          | AK051918  | 3    | 31111900   | 31123989  | 31110438  | 31110951  | IAPLTR2_Mm  | U    | 949   | sense   |
| Phf8          | AK040843  | X    | 146861902  | 146913227 | 146918864 | 146925949 | IAPLTR1_Mm  | Y    | 5637  | AS      |
| Plkd12        | AK131811  | 8    | 119895239  | 119910072 | 119888542 | 119893691 | IAPLTR1a_Mm | U    | 1608  | sense   |
| Poir1a        | AK031689  | 6    | 71838561   | 71884659  | 71884936  | 71890270  | IAPLTR1_Mm  | Y    | 277   | AS      |
| Poteg         | AK015473  | 8    | 28913605   | 28930048  | 28930570  | 28937625  | IAPLTR1_Mm  | U    | 522   | sense   |
| Prrxl1        | EU670677  | 14   | 31428416   | 31459362  | 31466759  | 31467209  | IAPLTR2_Mm  | U    | 7397  | sense   |
| Qrsi1         | AK038801  | 10   | 43569328   | 43590158  | 43565506  | 43568369  | IAPLTR2a    | U    | 959   | AS      |
| Rab3gap1      | AK035603  | 1    | 129696334  | 129709992 | 129719531 | 129724801 | IAPLTR1_Mm  | Y    | 9539  | AS      |
| Ralgapa1      | AK153664  | 12   | 56680885   | 56739208  | 56678094  | 56678382  | IAPEY3_LTR  | U    | 2303  | AS      |
| Rhbd12        | AK162292  | 4    | 123312450  | 123314508 | 123318547 | 123318952 | IAPLTR2_Mm  | N    | 4039  | AS      |
| Rnf157        | AK011693  | 11   | 116219936  | 116229122 | 116205495 | 116210800 | IAPLTR1_Mm  | Y    | 9136  | AS      |
| Sag           | AY651760  | 1    | 89635062   | 89656471  | 89664063  | 89664494  | IAPLTR2_Mm  | N    | 7592  | AS      |
| Sema3d        | AK134412  | 5    | 12389536   | 12514528  | 12523108  | 12527153  | IAPLTR1a_Mm | U    | 8580  | AS      |
| Sgip1         | AK0203945 | 4    | 102350825  | 102368582 | 102373594 | 102380766 | IAPLTR1_Mm  | U    | 5012  | AS      |
| Sirt5         | BC087898  | 13   | 43376484   | 43391648  | 43397766  | 43404850  | IAPLTR1a_Mm | U    | 6118  | sense   |
| Slc15a2       | BC018335  | 16   | 36691113   | 36704018  | 36684294  | 36689592  | IAPLTR1_Mm  | Y    | 1521  | sense   |
| Slc17a5       | AK087395  | 9    | 78355574   | 78373711  | 78348561  | 78353688  | IAPLTR1a_Mm | Y    | 1886  | sense   |
| Slc20a2       | AK076380  | 8    | 24004323   | 24006845  | 24016713  | 24023839  | IAPLTR1_Mm  | Y    | 9868  | sense   |
| Slc25a46      | BC020087  | 18   | 31724593   | 31752896  | 31723531  | 31723826  | IAPEY3_LTR  | U    | 767   | sense   |
| Slc38a1       | AK050914  | 15   | 96412266   | 96470284  | 96408676  | 96409323  | IAPEY3_LTR  | U    | 2943  | sense   |
| Slc38a1       | AK050914  | 15   | 96412266   | 96470284  | 96409340  | 96409939  | IAPEY3      | U    | 2327  | sense   |
| Slc38a1       | AK050914  | 15   | 96412266   | 96470284  | 96411103  | 96411401  | IAPEY3_LTR  | U    | 865   | sense   |
| Slc6b1        | AK016463  | 1    | 98777925   | 98827974  | 98774847  | 98775165  | IAPLTR2b    | U    | 2760  | AS      |
| Snx29         | BC034114  | 16   | 11334285   | 11592913  | 11593592  | 11598886  | IAPLTR1_Mm  | Y    | 679   | sense   |
| Smad2         | AK005920  | 3    | 108353629  | 108354024 | 108346630 | 108346758 | IAPEz       | U    | 6871  | AS      |
| Tbc1d22a      | AK178601  | 15   | 86119924   | 86139607  | 86140030  | 86145361  | IAPLTR1_Mm  | Y    | 423   | AS      |
| Tcfcp2        | AK076444  | 15   | 100374099  | 100379808 | 100370544 | 100373739 | IAPEY2_LTR  | U    | 360   | AS      |
| Tmco3         | AK177090  | 8    | 13303785   | 13308376  | 13317387  | 13317707  | IAPLTR3     | U    | 9011  | sense   |
| Tmed7         | AK180182  | 18   | 46718702   | 46722573  | 46715367  | 46715766  | IAPLTR2a    | N    | 2936  | AS      |
| Trpm2         | AK039405  | 10   | 77365918   | 77372926  | 77353859  | 77361014  | IAPLTR1_Mm  | U    | 4904  | AS      |
| Txdcd11       | AK156590  | 16   | 11027666   | 11048191  | 11019642  | 11020199  | IAPLTR3     | U    | 7467  | AS      |
| Uty           | AK043154  | Y    | 508989     | 582181    | 508356    | 508824    | IAPLTR2_Mm  | U    | 165   | AS      |
| Vps52         | AK178157  | 17   | 33573188   | 33573472  | 33574867  | 33575206  | IAPLTR1a_Mm | U    | 1395  | AS      |
| Whsc1         | AK031931  | 5    | 34191611   | 34194139  | 34200255  | 34200686  | IAPLTR2_Mm  | N    | 6116  | AS      |
| Zfand3        | EF437371  | 17   | 29862373   | 29862507  | 29869271  | 29869657  | IAPLTR2a    | N    | 6764  | AS      |
| Zfp407        | AK132276  | 18   | 84414012   | 84546613  | 84410958  | 84411060  | IAPEz       | U    | 2952  | sense   |

**Supp. Table 5. Identification of candidate transcripts truncated prematurely by ERV integrants. A**

bioinformatics screen was conducted to identify candidate transcripts that may be disrupted by ERV integrants within 10 kb genomic distance from premature termination sites. This analysis focused on reference B6 genes, because currently available mouse transcriptome data are limited mostly to that lineage. Presented here are gene names; *gb\_acc*, truncated transcript GenBank accession numbers; chromosomal coordinates for the truncated gene and the ERV; the ERV subfamily (defined by RepeatMasker); *poly*, ERV polymorphism status at orthologous position in four other Celera strains compared with presence in reference genome (*Y*, polymorphic; *N*, non-polymorphic; *U*, unknown due to partial sequence coverage at locus); *dist.*, genomic distance from ERV to prematurely terminated transcript end; and *orient.*, the orientation of the ERV relative to the gene's coding strand. *Slc15a2* (**Fig. 3 - 7**), *Polr1a* (**Fig. 8**) and *Cdk5rap1* (Druker et al. 2004) were identified in this screen. *Spon1* (**Fig. 8**) is not listed here, although its transcription is disrupted by an intronic ERV (Fig. 8), because the distance from the ERV to its premature termination site is > 10 kb, exceeding the arbitrary cutoff used here.
